# Supplementary material for: Reactions of diphenacylaniline and diphenacyl sulfide under Gewald conditions: generation of enamines and thioamides
Source: Royal Society of Chemistry journal article supplement (doi:10.1039/c3ra21556c), 2013-01-01
Supplement: c3ra21556c.pdf [file c3ra21556c.pdf]

## Supporting Information

### Reaction of diphenacylaniline and diphenacyl sulfide under Gewald condition: Generation of enamine / thioamide

Nidhin Paul, Ramalingam Sathishkumar, Chellathurai Anuba, Shanmugam  
Muthusubramanian\*

*Department of Organic Chemistry, School of Chemistry, Madurai Kamaraj University,*

*Madurai - 625021, Tamil Nadu, India. Fax: 91-452-2459845.*

*E-mail: [muthumanian2001@yahoo.com](mailto:muthumanian2001@yahoo.com)*

## Experimental

### General

Melting points were measured in open capillary tubes and are uncorrected. The  $^1\text{H}$ ,  $^{13}\text{C}$  and 2D NMR were recorded on a Bruker (Avance) 300 MHz NMR instrument using TMS as internal standard and  $\text{CDCl}_3$  as solvent. Standard Bruker software was used throughout. Chemical shifts are given in parts per million ( $\delta$ -scale) and the coupling constants are given in Hertz. Silica gel-G plates (Merck) were used for TLC analysis with a mixture of petroleum ether (60–80 °C) and ethylacetate as eluant. Electrospray ionisation mass spectrometry (ESI-MS) analysis was performed in the positive ion mode on a liquid chromatography-ion trap mass spectrometer (LCQ Fleet, Thermo Fisher Instruments Limited, US). Elemental analyses were performed on a Perkin Elmer 2400 Series II Elemental CHNS analyzer.

| No. | List of Figures                                                       | Page |
|-----|-----------------------------------------------------------------------|------|
| 1   | $^1\text{H}$ NMR Spectrum of <b>8a</b> (recorded in $\text{CDCl}_3$ ) | 04   |
| 2   | $^1\text{H}$ NMR Spectrum of <b>8a</b> (expanded)                     | 04   |
| 3   | $^{13}\text{C}$ NMR Spectrum of <b>8a</b> ( $\text{CDCl}_3$ )         | 05   |
| 4   | DEPT-135 Spectrum of <b>8a</b> ( $\text{CDCl}_3$ )                    | 05   |
| 5   | H,H-COSY Spectrum of <b>8a</b>                                        | 06   |
| 6   | HMBC Spectrum of <b>8a</b>                                            | 06   |

|    |                                                                |    |
|----|----------------------------------------------------------------|----|
| 7  | HMBC Spectrum of <b>8a</b> (expanded)                          | 07 |
| 8  | C,H-COSY Spectrum of <b>8a</b>                                 | 07 |
| 9  | C,H-COSY Spectrum of <b>8a</b> (expanded)                      | 08 |
| 10 | <sup>1</sup> H NMR Spectrum of <b>8b</b> (CDCl <sub>3</sub> )  | 08 |
| 11 | <sup>13</sup> C NMR Spectrum of <b>8b</b> (CDCl <sub>3</sub> ) | 09 |
| 12 | <sup>1</sup> H NMR Spectrum of <b>8c</b> (CDCl <sub>3</sub> )  | 09 |
| 13 | <sup>13</sup> C NMR Spectrum of <b>8c</b> (expanded)           | 10 |
| 14 | <sup>1</sup> H NMR Spectrum of <b>8d</b> (CDCl <sub>3</sub> )  | 10 |
| 15 | <sup>13</sup> C NMR Spectrum of <b>8d</b>                      | 11 |
| 16 | <sup>1</sup> H NMR Spectrum of <b>8e</b> (CDCl <sub>3</sub> )  | 11 |
| 17 | <sup>1</sup> H NMR Spectrum of <b>8e</b> (expanded)            | 12 |
| 18 | <sup>13</sup> C NMR Spectrum of <b>8e</b> (CDCl <sub>3</sub> ) | 12 |
| 19 | <sup>1</sup> H NMR Spectrum of <b>8f</b> (CDCl <sub>3</sub> )  | 13 |
| 20 | <sup>13</sup> C NMR Spectrum of <b>8f</b> (expanded)           | 13 |
| 21 | <sup>1</sup> H NMR Spectrum of <b>8g</b> (CDCl <sub>3</sub> )  | 14 |
| 22 | <sup>1</sup> H NMR Spectrum of <b>8g</b> (expanded)            | 14 |
| 23 | <sup>1</sup> H NMR Spectrum of <b>8h</b> (CDCl <sub>3</sub> )  | 15 |
| 24 | <sup>13</sup> C NMR Spectrum of <b>8h</b>                      | 15 |
| 25 | <sup>1</sup> H NMR Spectrum of <b>8i</b> (CDCl <sub>3</sub> )  | 16 |
| 26 | <sup>1</sup> H NMR Spectrum of <b>8i</b> (expanded)            | 16 |
| 27 | <sup>13</sup> C NMR Spectrum of <b>8i</b> (CDCl <sub>3</sub> ) | 17 |
| 28 | <sup>1</sup> H NMR Spectrum of <b>8j</b> (CDCl <sub>3</sub> )  | 17 |
| 29 | <sup>13</sup> C NMR Spectrum of <b>8j</b>                      | 18 |
| 30 | <sup>1</sup> H NMR Spectrum of <b>8k</b> (CDCl <sub>3</sub> )  | 18 |
| 31 | <sup>13</sup> C NMR Spectrum of <b>8k</b>                      | 19 |
| 32 | <sup>1</sup> H NMR Spectrum of <b>5a</b>                       | 19 |
| 33 | <sup>13</sup> C NMR Spectrum of <b>5a</b> (CDCl <sub>3</sub> ) | 20 |
| 34 | DEPT-135 Spectrum of <b>5a</b> (CDCl <sub>3</sub> )            | 20 |
| 35 | <sup>1</sup> H NMR Spectrum of <b>5b</b>                       | 21 |
| 36 | <sup>13</sup> C NMR Spectrum of <b>5b</b> (CDCl <sub>3</sub> ) | 21 |
| 37 | <sup>1</sup> H NMR Spectrum of <b>5c</b>                       | 22 |
| 38 | <sup>13</sup> C NMR Spectrum of <b>5c</b> (CDCl <sub>3</sub> ) | 22 |

|    |                                                                |    |
|----|----------------------------------------------------------------|----|
| 39 | <sup>1</sup> H NMR Spectrum of <b>5d</b>                       | 23 |
| 40 | <sup>13</sup> C NMR Spectrum of <b>5d</b> (CDCl <sub>3</sub> ) | 23 |
| 41 | <sup>1</sup> H NMR Spectrum of <b>5e</b> (CDCl <sub>3</sub> )  | 24 |
| 42 | <sup>13</sup> C NMR Spectrum of <b>5e</b>                      | 24 |
| 43 | <sup>1</sup> H NMR Spectrum of <b>5f</b>                       | 25 |
| 44 | <sup>13</sup> C NMR Spectrum of <b>5f</b> (CDCl <sub>3</sub> ) | 25 |
| 45 | H,H-COSY Spectrum of <b>5f</b>                                 | 26 |
| 46 | <sup>1</sup> H NMR Spectrum of <b>5g</b>                       | 26 |
| 47 | <sup>13</sup> C NMR Spectrum of <b>5g</b> (CDCl <sub>3</sub> ) | 27 |
| 48 | H,H-COSY Spectrum of <b>5g</b>                                 | 27 |
| 49 | C,H-COSY Spectrum of <b>5g</b>                                 | 28 |
| 50 | <sup>1</sup> H NMR Spectrum of <b>5h</b>                       | 28 |
| 51 | <sup>13</sup> C NMR Spectrum of <b>5h</b> (CDCl <sub>3</sub> ) | 29 |
| 52 | <sup>1</sup> H NMR Spectrum of <b>5i</b> (CDCl <sub>3</sub> )  | 29 |
| 53 | <sup>1</sup> H NMR Spectrum of <b>5i</b> (expanded)            | 30 |
| 54 | Mass spectrum of <b>8g</b>                                     | 30 |
| 55 | Mass spectrum of <b>8j</b>                                     | 31 |
| 56 | <sup>1</sup> H NMR Spectrum of <b>11</b> (CDCl <sub>3</sub> )  | 31 |
| 57 | <sup>1</sup> H NMR Spectrum of <b>11</b> (expanded)            | 32 |
| 58 | <sup>13</sup> C NMR Spectrum of <b>11</b> (CDCl <sub>3</sub> ) | 32 |
| 59 | DEPT Spectrum of <b>11</b> (CDCl <sub>3</sub> )                | 33 |
| 60 | H,H-COSY Spectrum of <b>11</b> (CDCl <sub>3</sub> )            | 33 |
| 61 | H,H-COSY Spectrum of <b>11</b> (expanded)                      | 34 |
| 62 | HMBC Spectrum of <b>11</b>                                     | 34 |
| 63 | HMBC Spectrum of <b>11</b> (expanded)                          | 35 |
| 64 | C,H-COSY Spectrum of <b>11</b>                                 | 35 |
| 65 | <sup>1</sup> H NMR Spectrum of <b>9</b> (CDCl <sub>3</sub> )   | 36 |
| 66 | <sup>13</sup> C NMR Spectrum of <b>9</b> (CDCl <sub>3</sub> )  | 36 |
| 67 | Mass spectrum for <b>11</b>                                    | 37 |
| 68 | Crystal Data for compound <b>5b</b>                            | 38 |

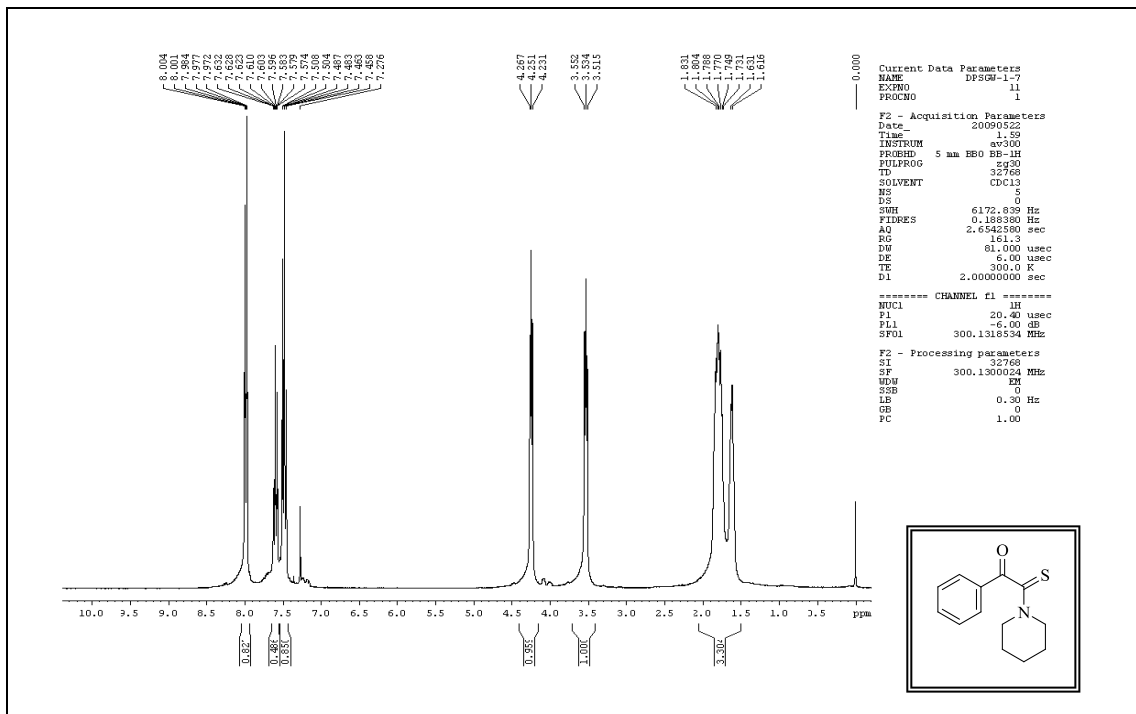

Figure 1. <sup>1</sup>H NMR Spectrum of **8a** (CDCl<sub>3</sub>)

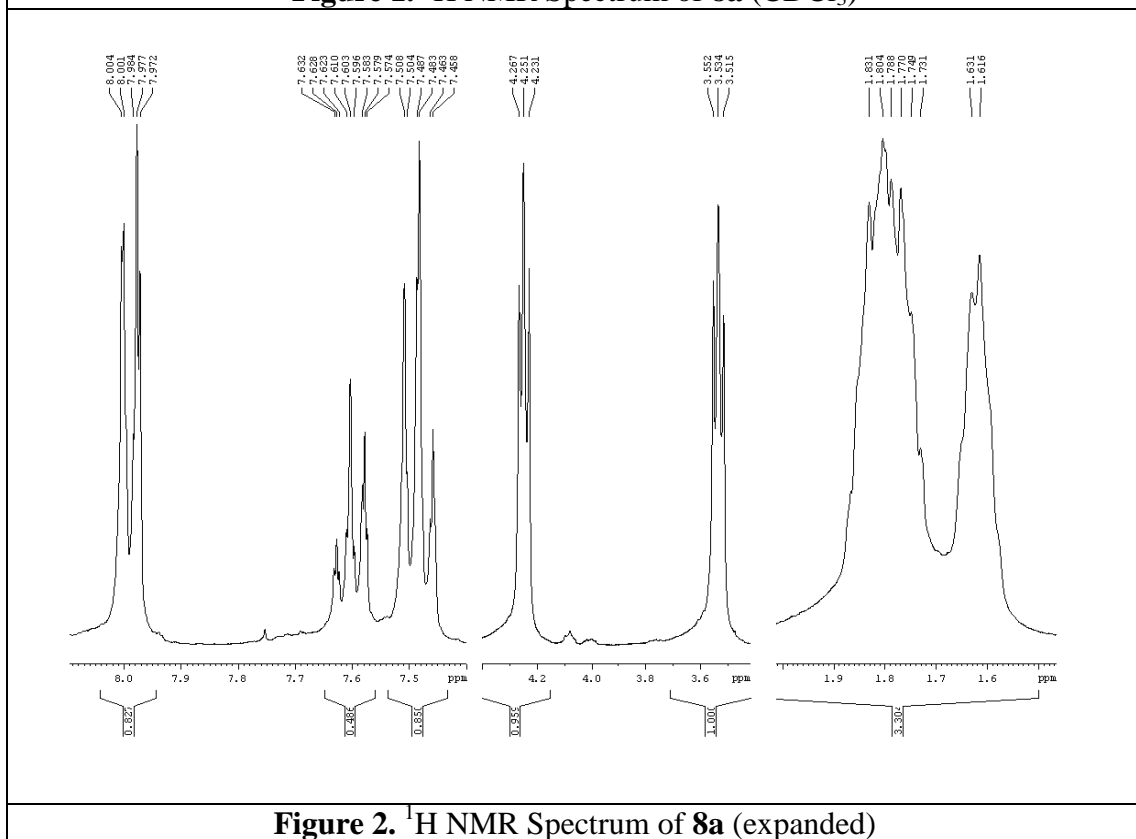

Figure 2. <sup>1</sup>H NMR Spectrum of **8a** (expanded)

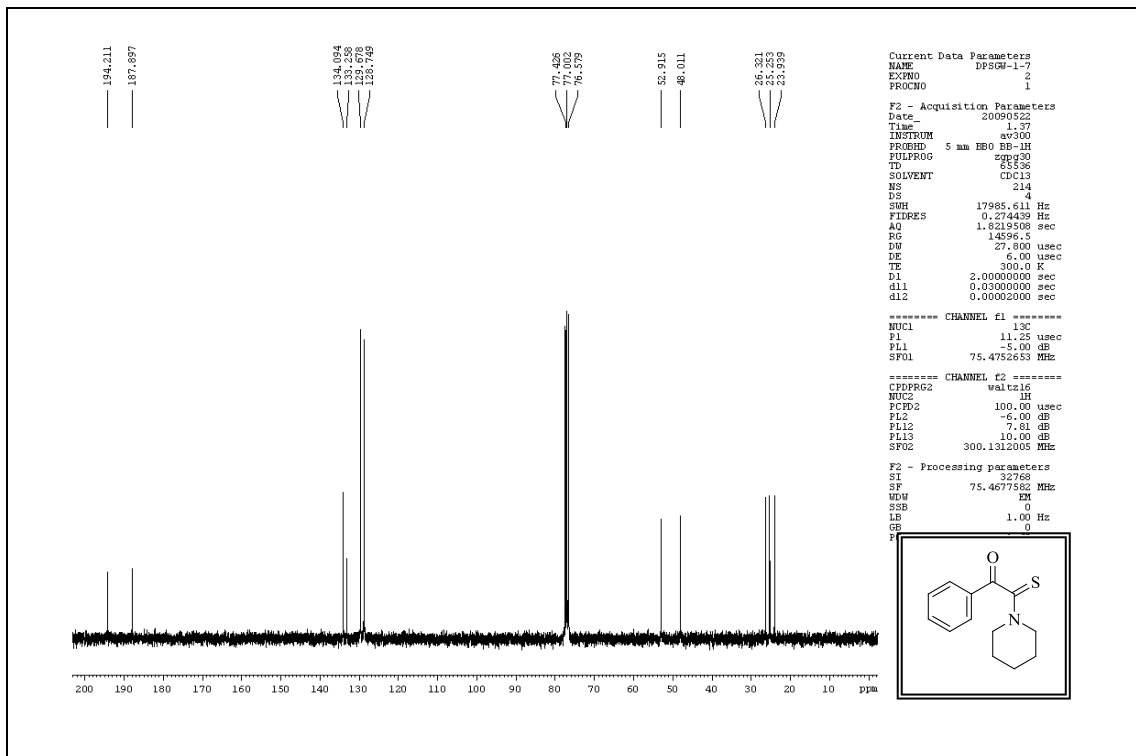

Figure 3. <sup>13</sup>C NMR Spectrum of 8a (CDCl<sub>3</sub>)

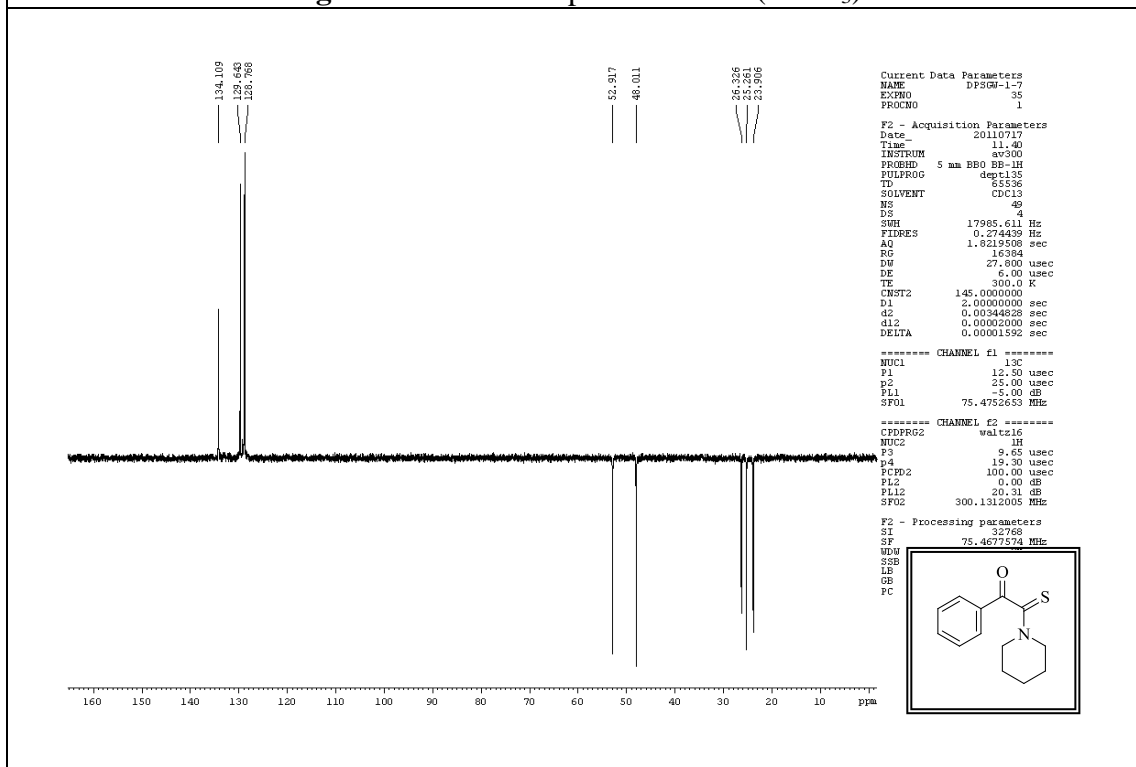

Figure 4. DEPT-135 Spectrum of 8a (CDCl<sub>3</sub>)

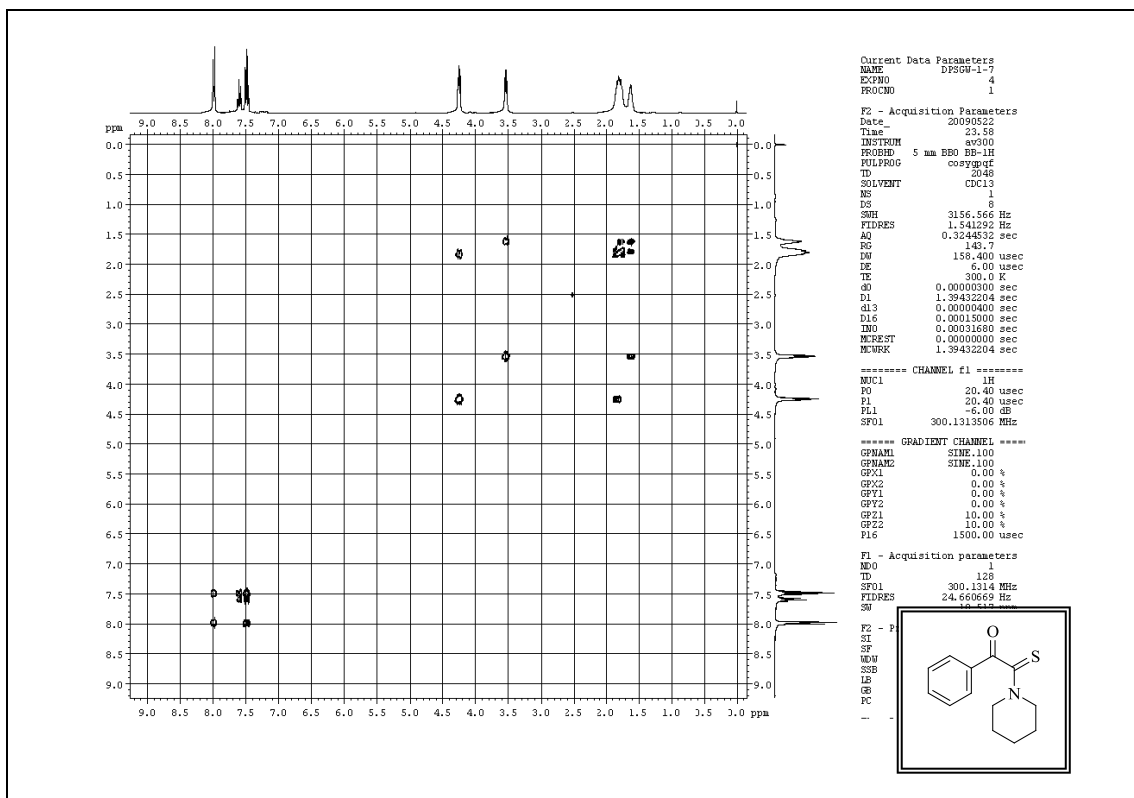

Figure 5. H,H-COSY Spectrum of 8a

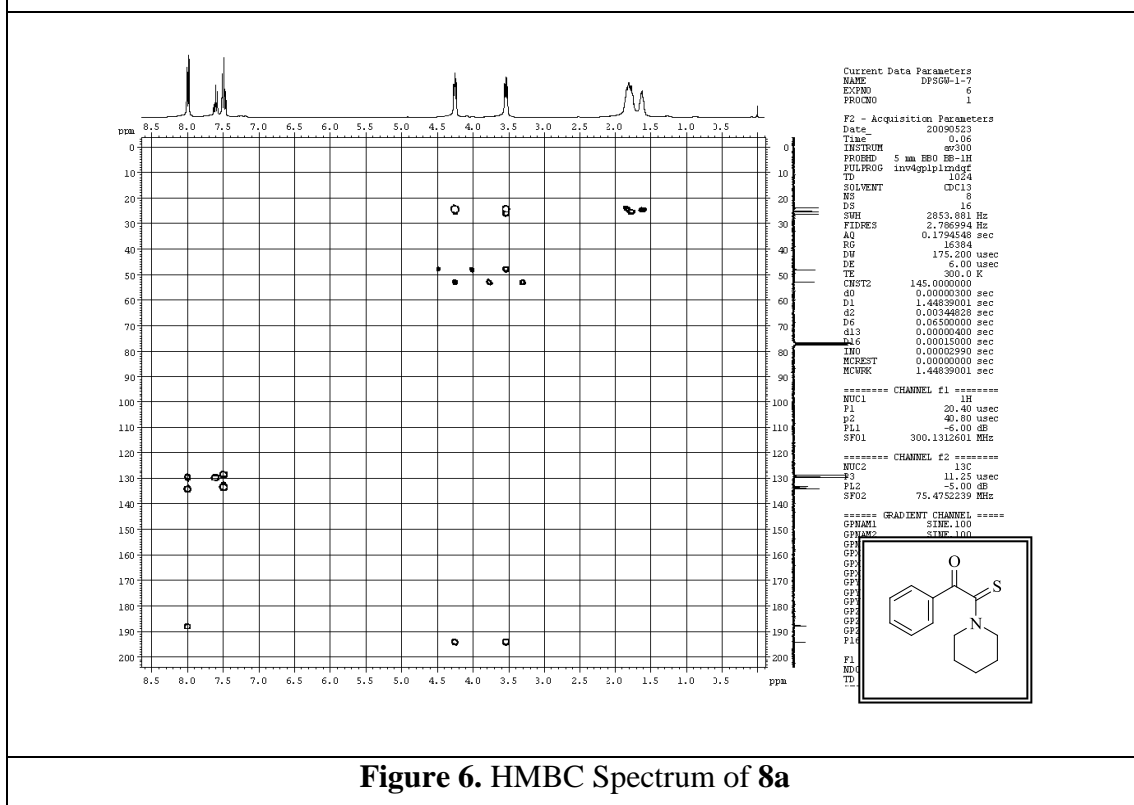

Figure 6. HMBC Spectrum of 8a

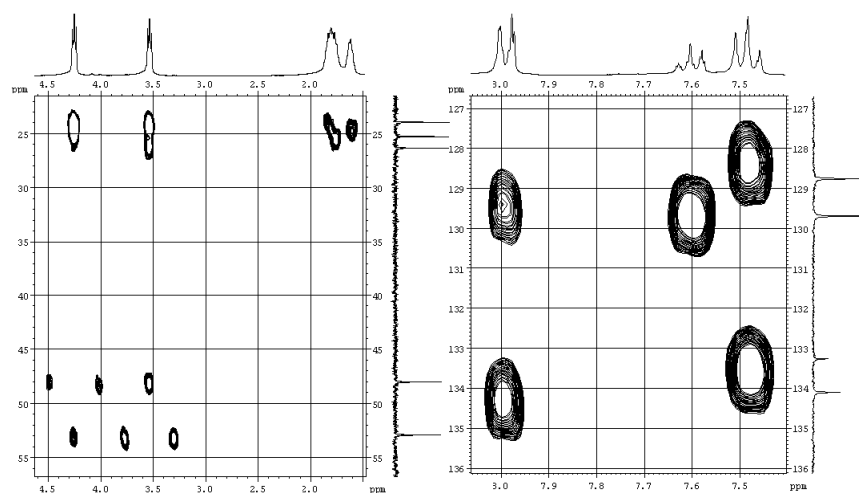

Figure 7. HMBC Spectrum of **8a** (expanded)

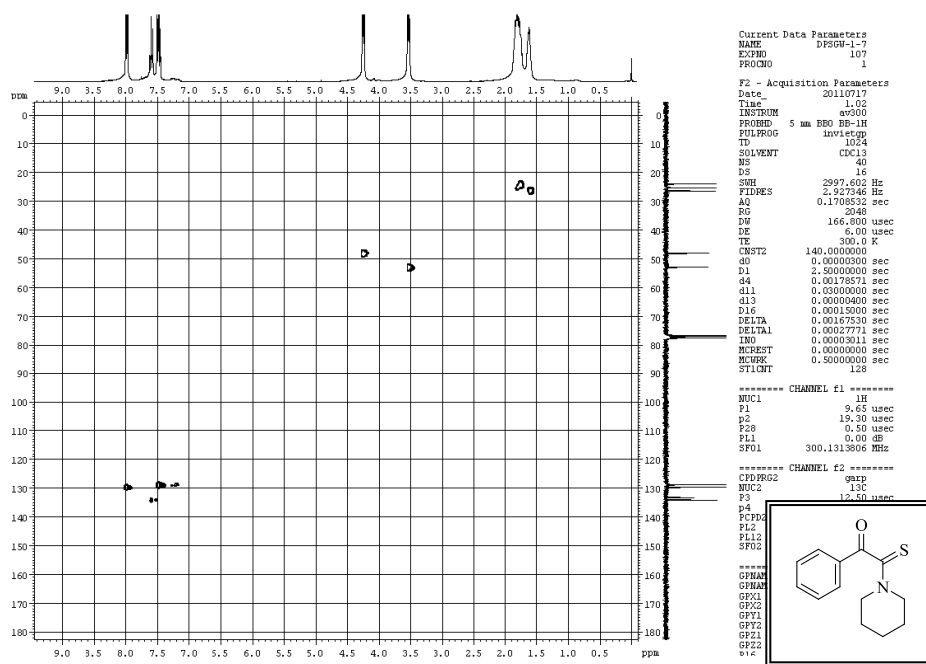

Figure 8. C,H-COSY Spectrum of **8a**

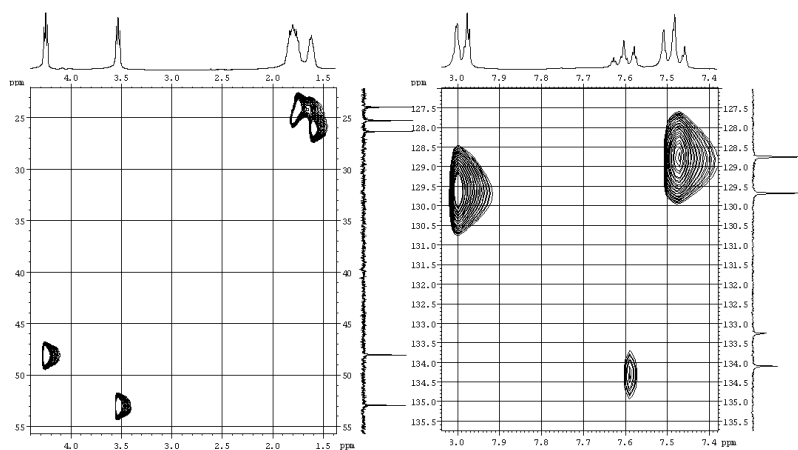

Figure 9. C,H-COSY Spectrum of **8a** (expanded)

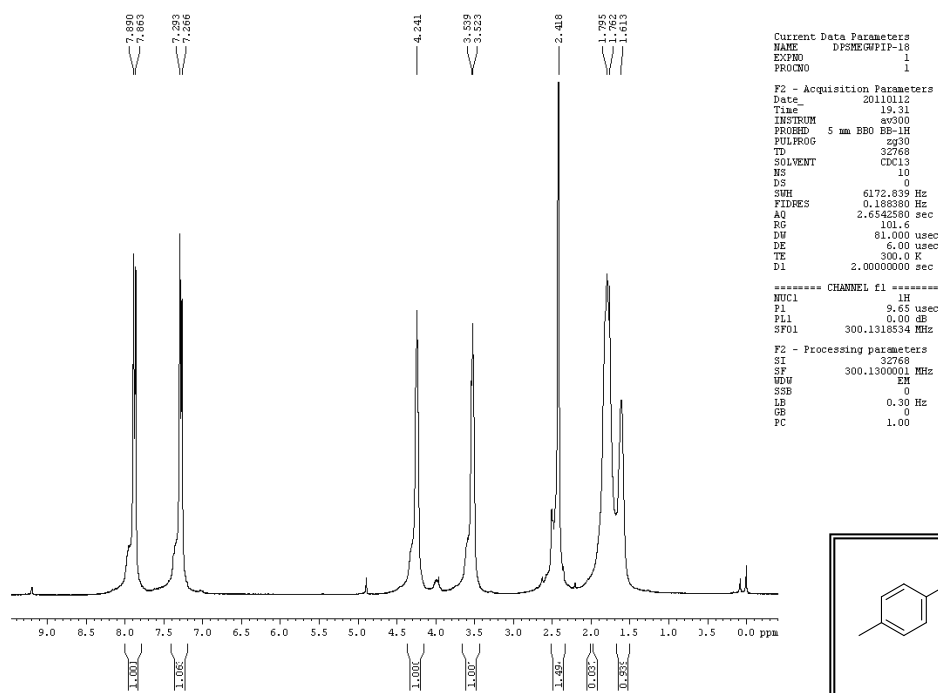

Figure 10.  $^1\text{H}$  NMR Spectrum of **8b** ( $\text{CDCl}_3$ )



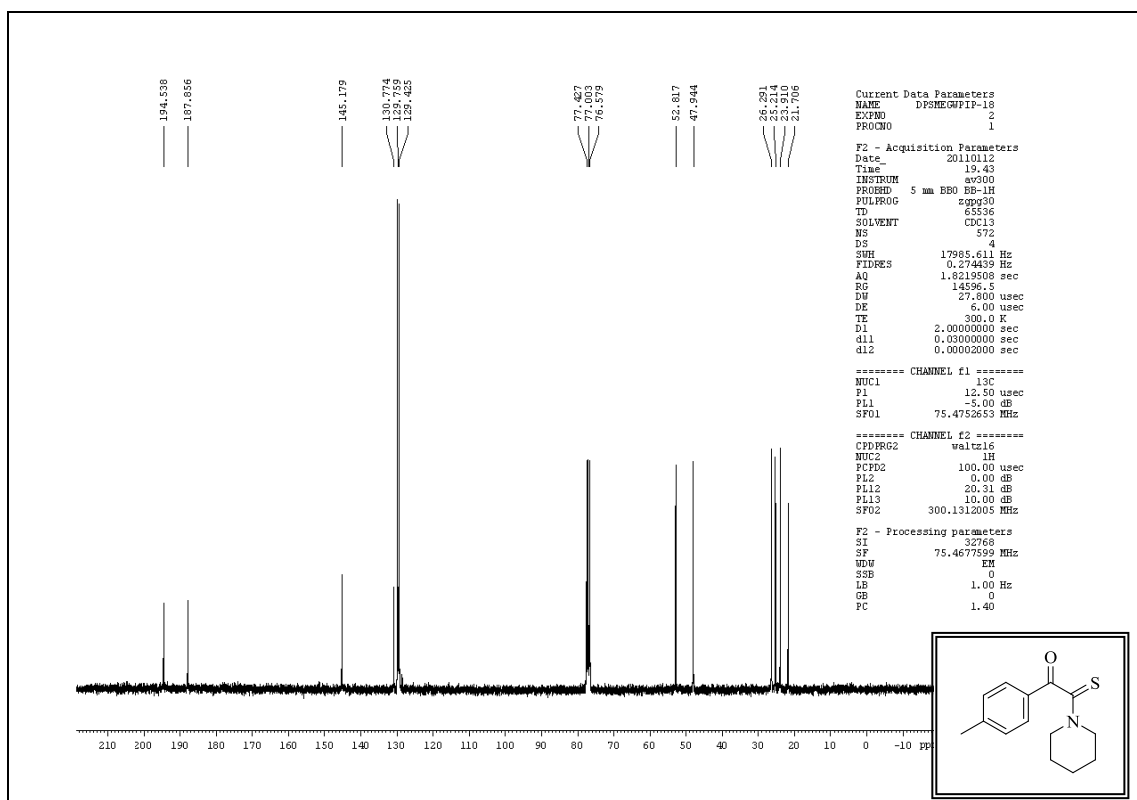

Figure 11.  $^{13}\text{C}$  NMR Spectrum of **8b** ( $\text{CDCl}_3$ )

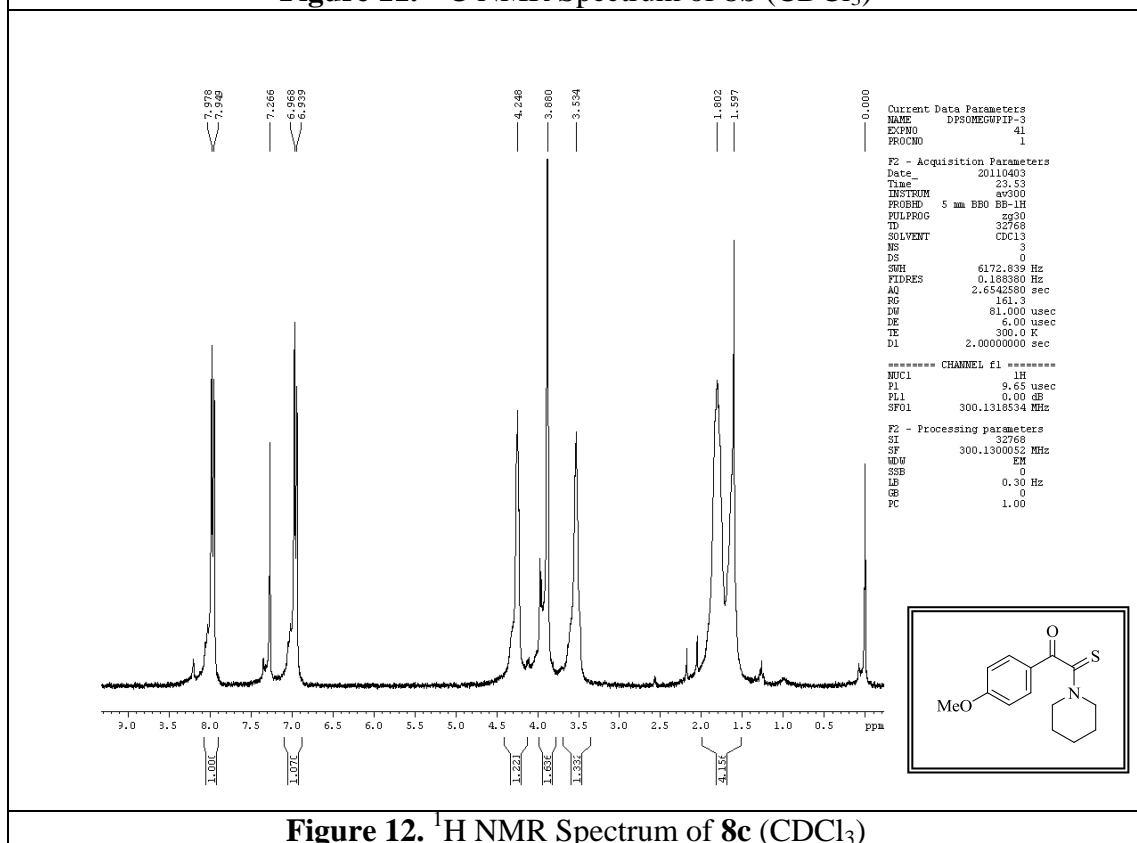

Figure 12.  $^1\text{H}$  NMR Spectrum of **8c** ( $\text{CDCl}_3$ )

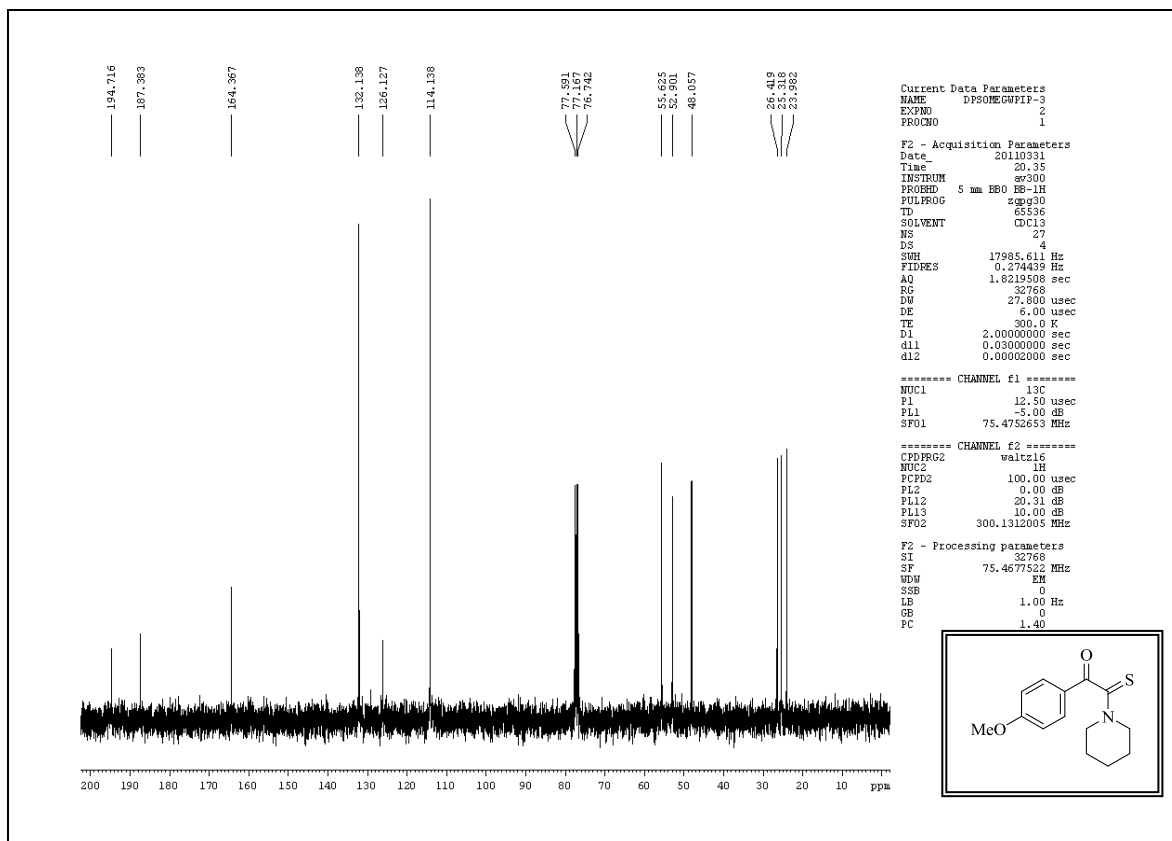

**Figure 13.**  $^{13}\text{C}$  NMR Spectrum of **8c** (expanded)

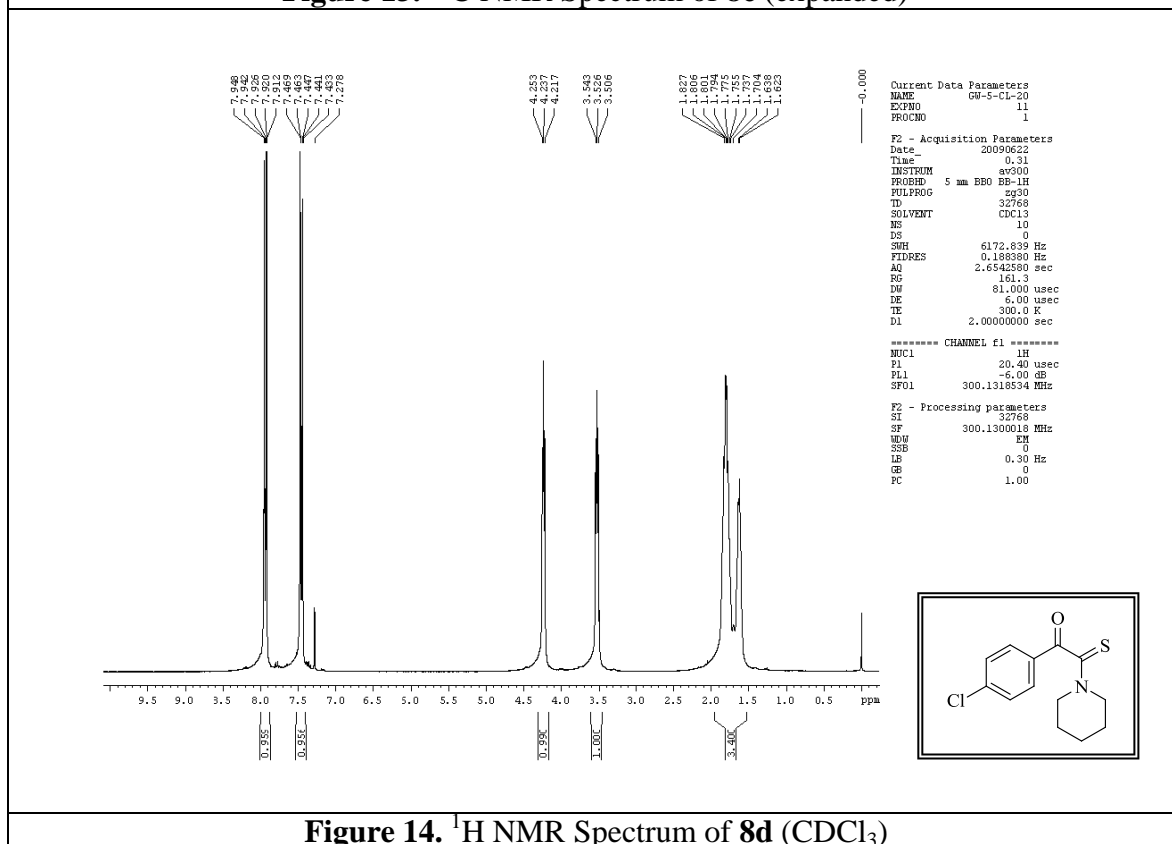

**Figure 14.**  $^1\text{H}$  NMR Spectrum of **8d** ( $\text{CDCl}_3$ )

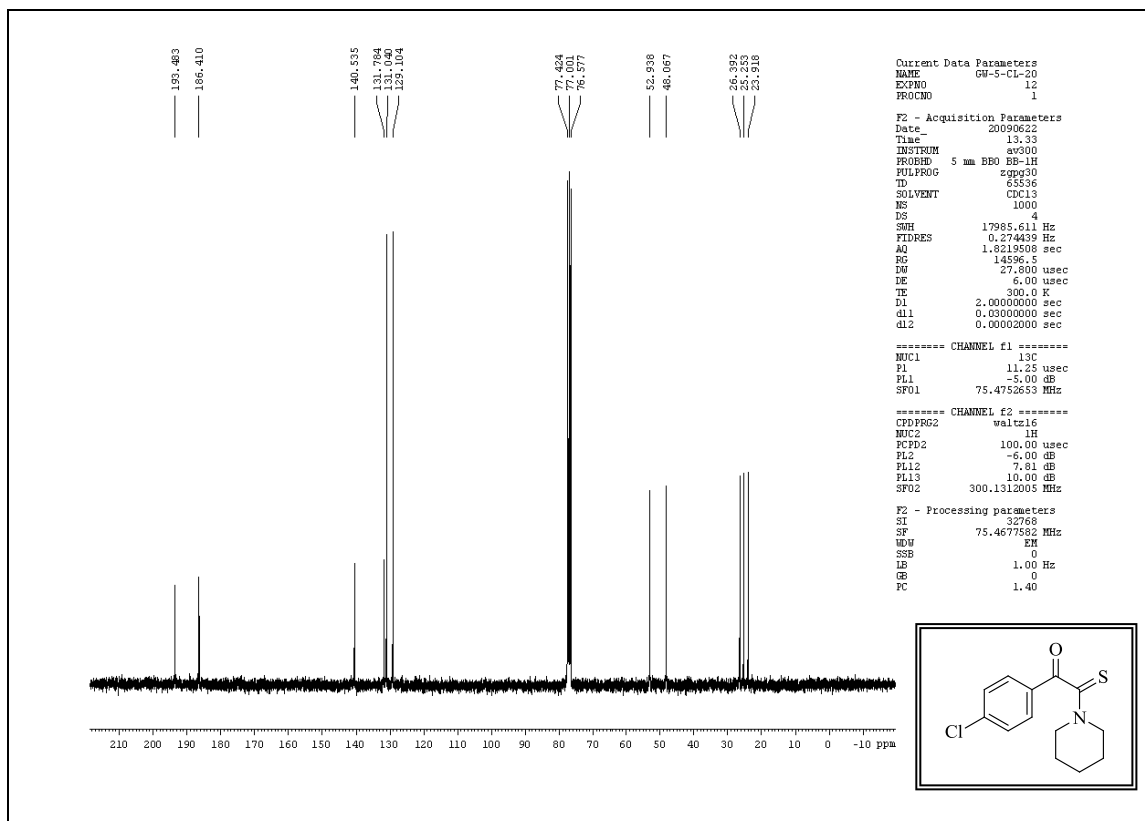

Figure 15.  $^{13}\text{C}$  NMR Spectrum of **8d** (expanded)

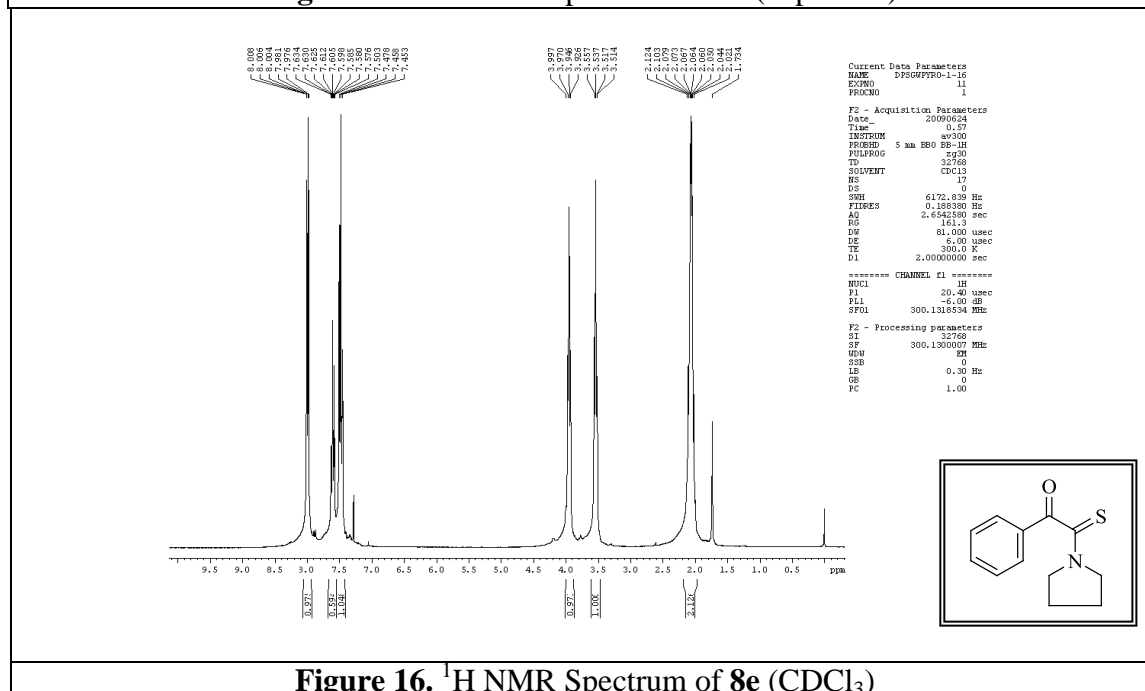

Figure 16.  $^1\text{H}$  NMR Spectrum of **8e** ( $\text{CDCl}_3$ )

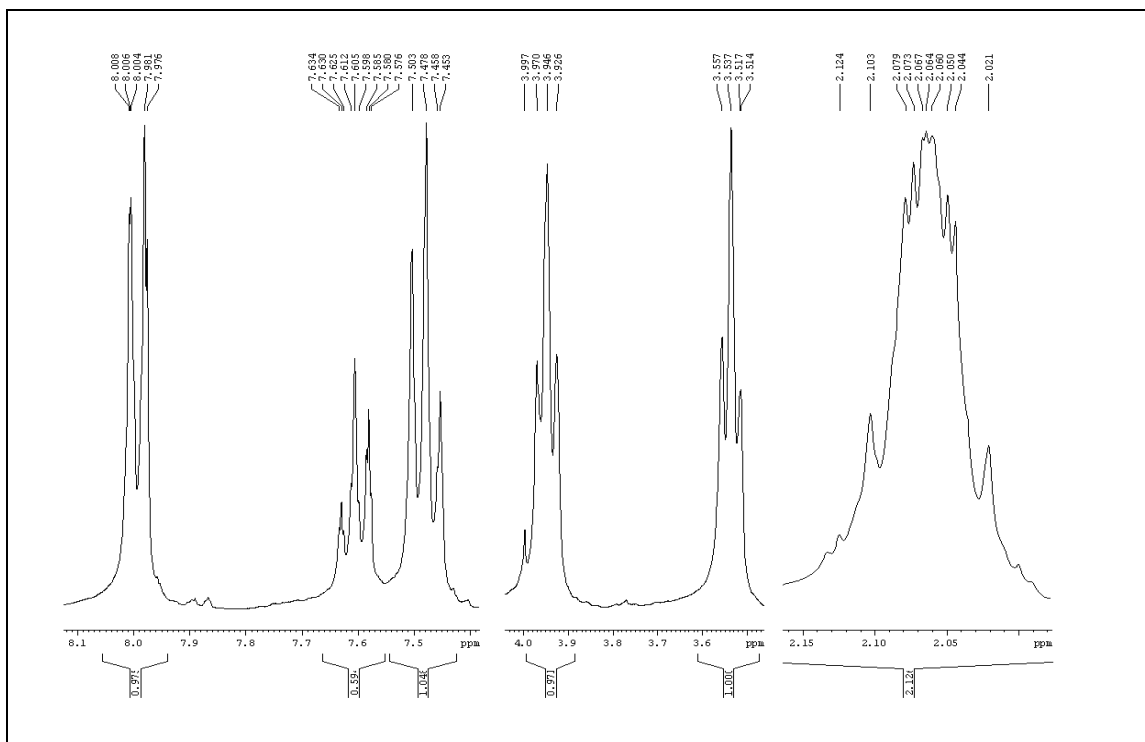

Figure 17.  $^1\text{H}$  NMR Spectrum of **8e** (expanded)

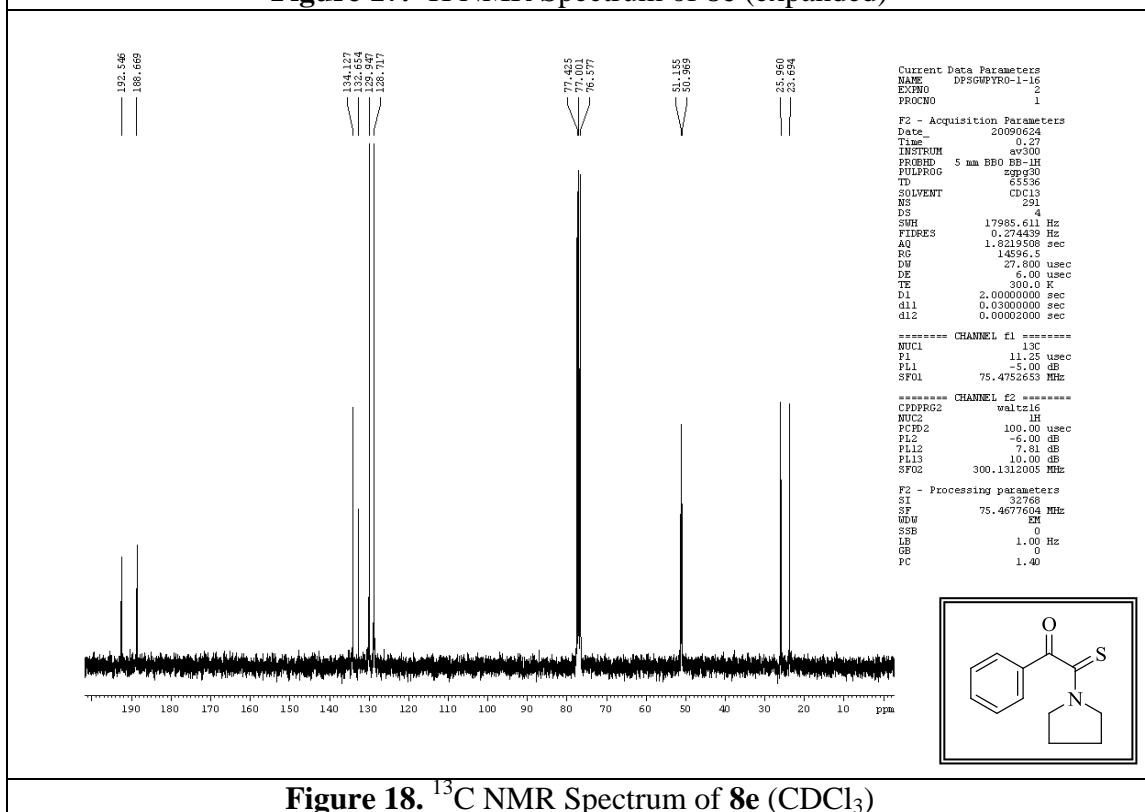

Figure 18.  $^{13}\text{C}$  NMR Spectrum of **8e** ( $\text{CDCl}_3$ )

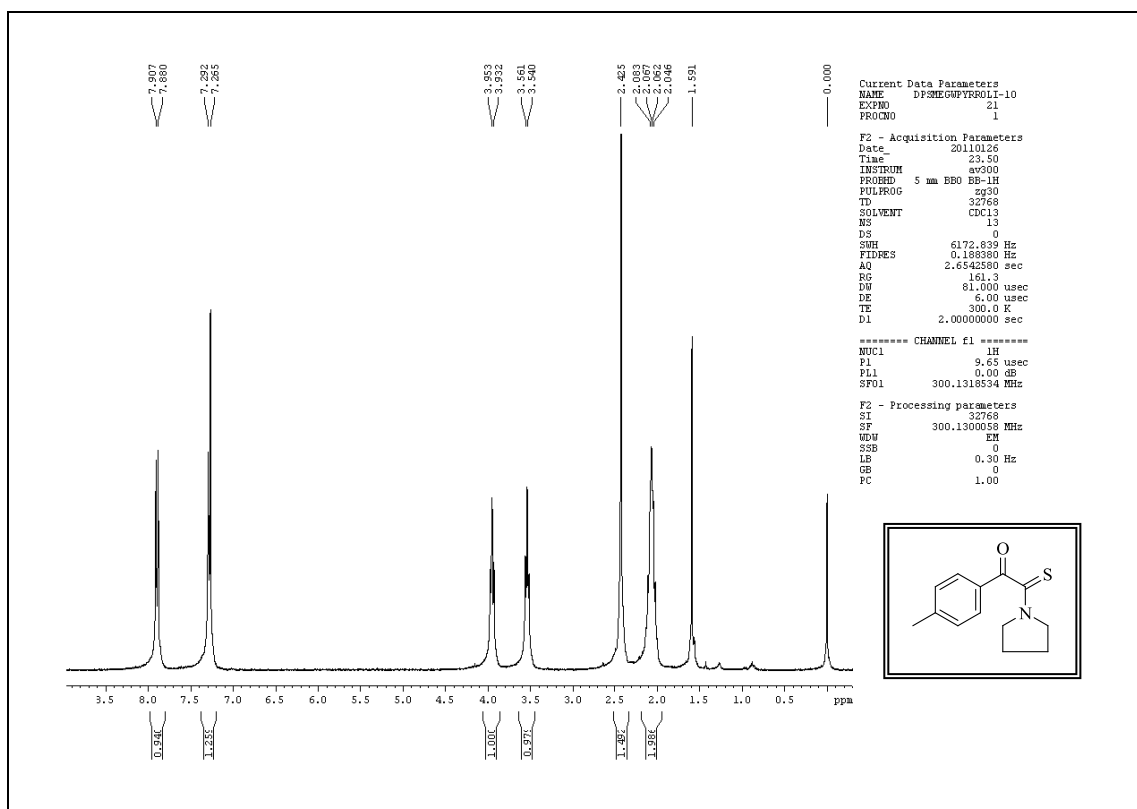

Figure 19. <sup>1</sup>H NMR Spectrum of **8f** (CDCl<sub>3</sub>)

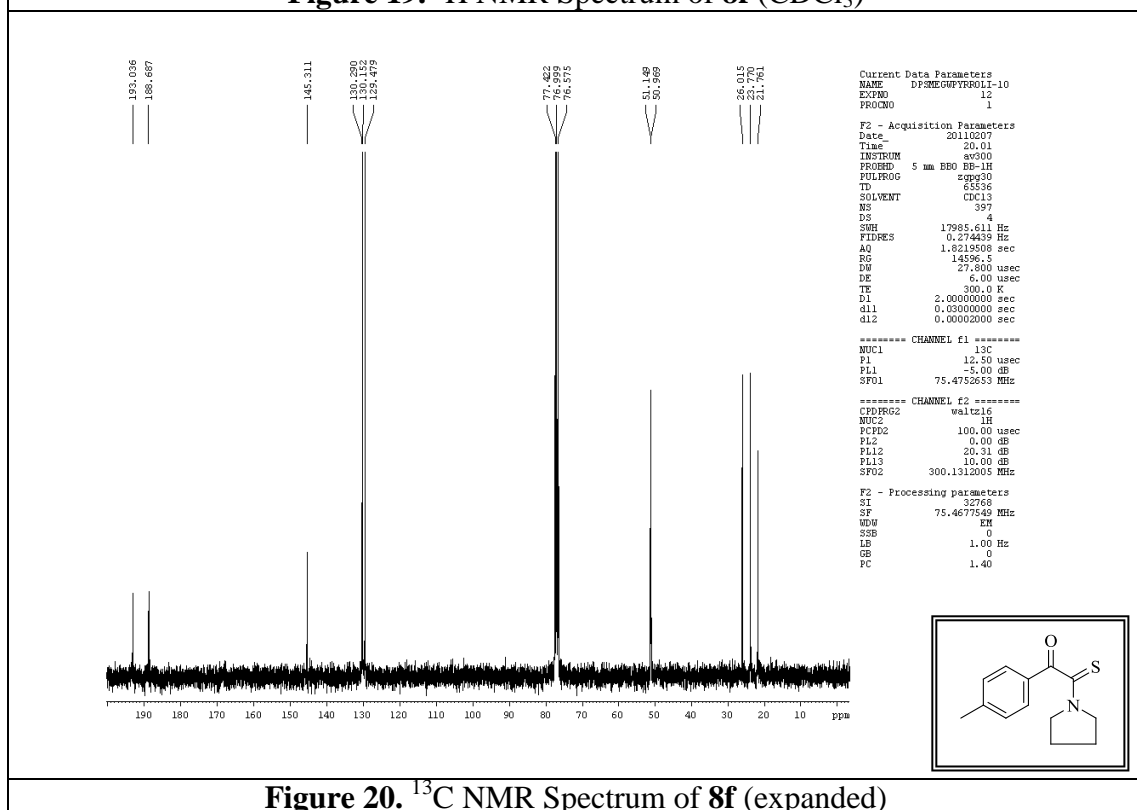

Figure 20. <sup>13</sup>C NMR Spectrum of **8f** (expanded)

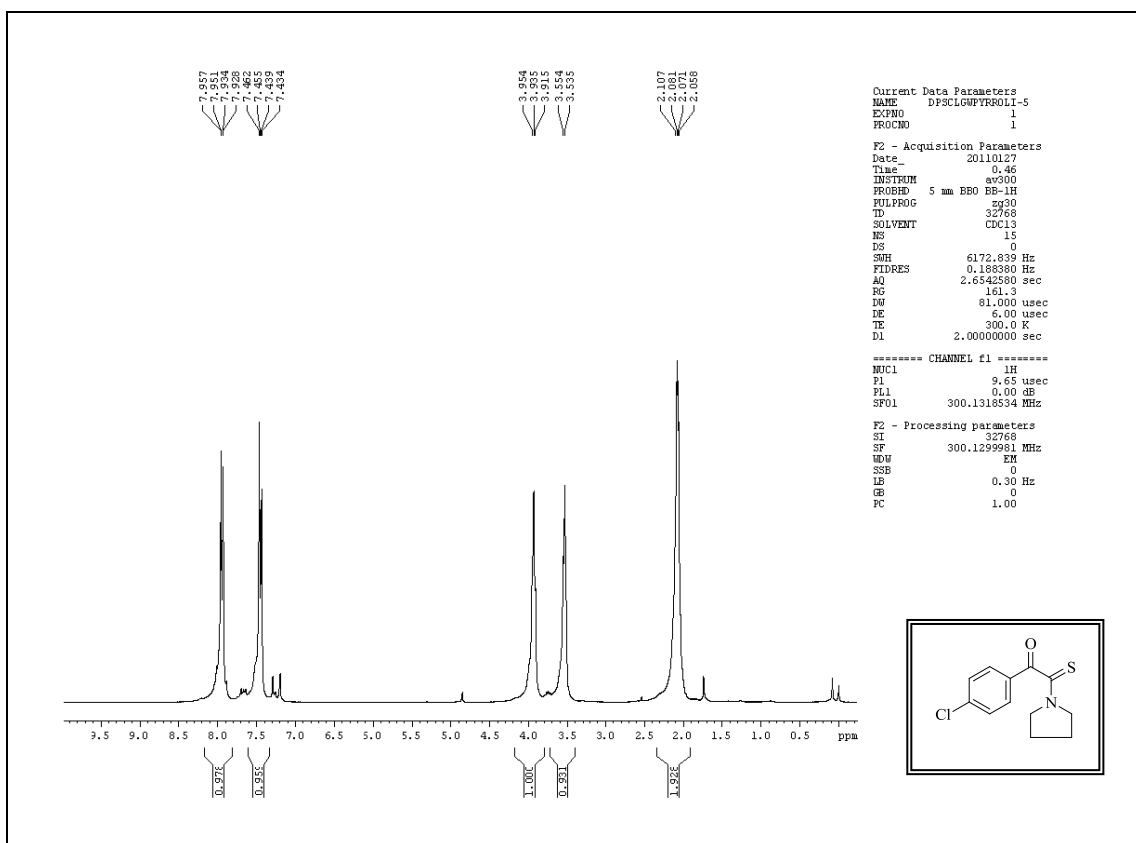

Figure 21. <sup>1</sup>H NMR Spectrum of **8g** (CDCl<sub>3</sub>)

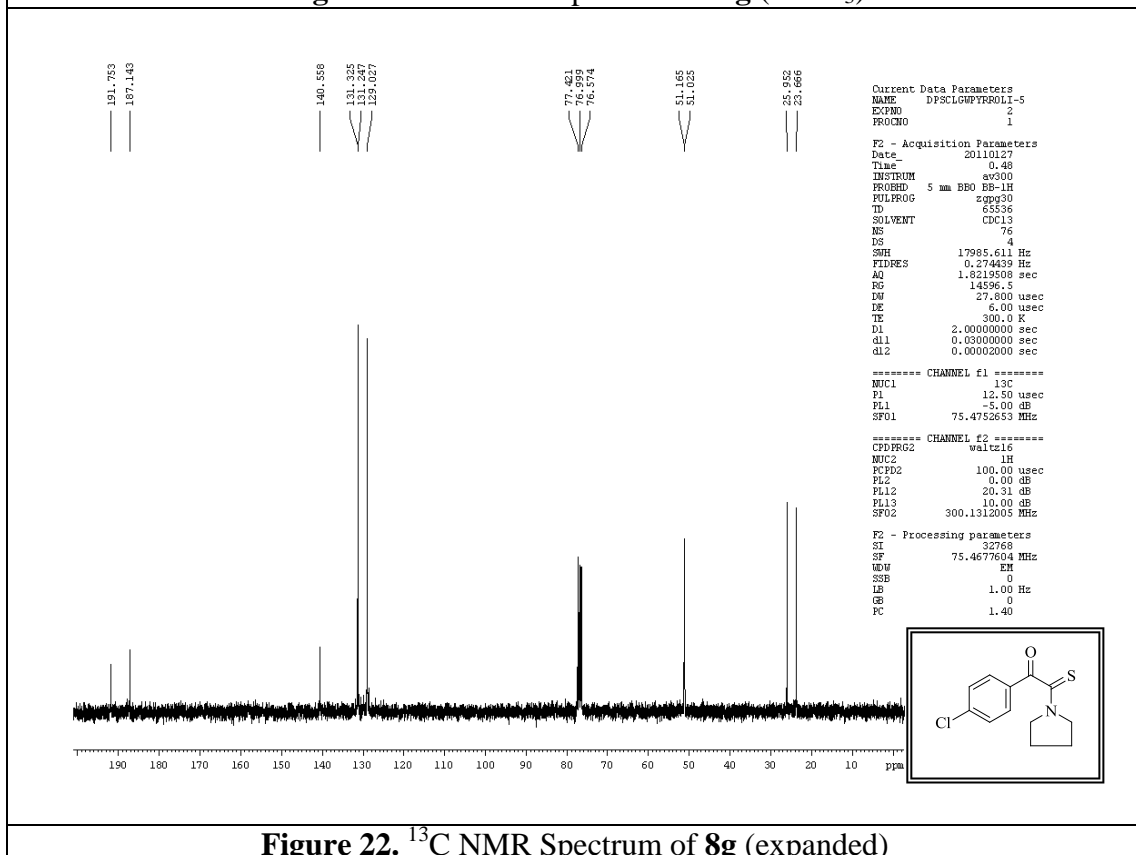

Figure 22. <sup>13</sup>C NMR Spectrum of **8g** (expanded)

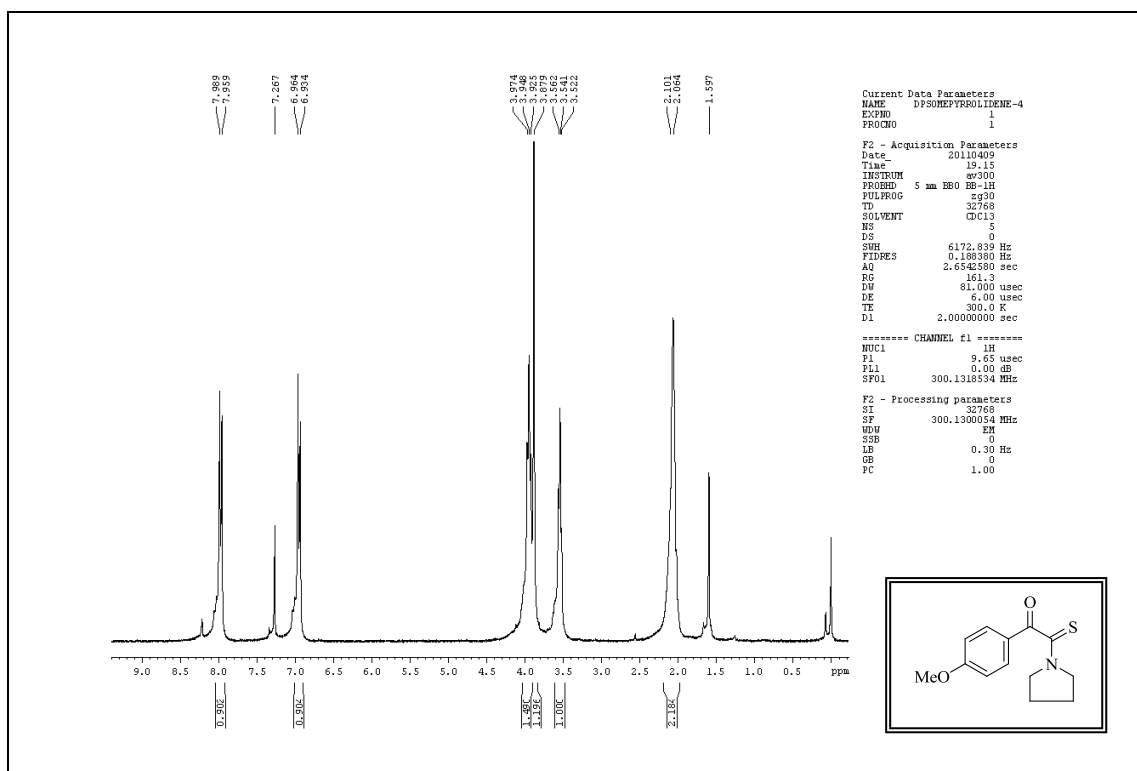

Figure 23.  $^1\text{H}$  NMR Spectrum of **8h** ( $\text{CDCl}_3$ )

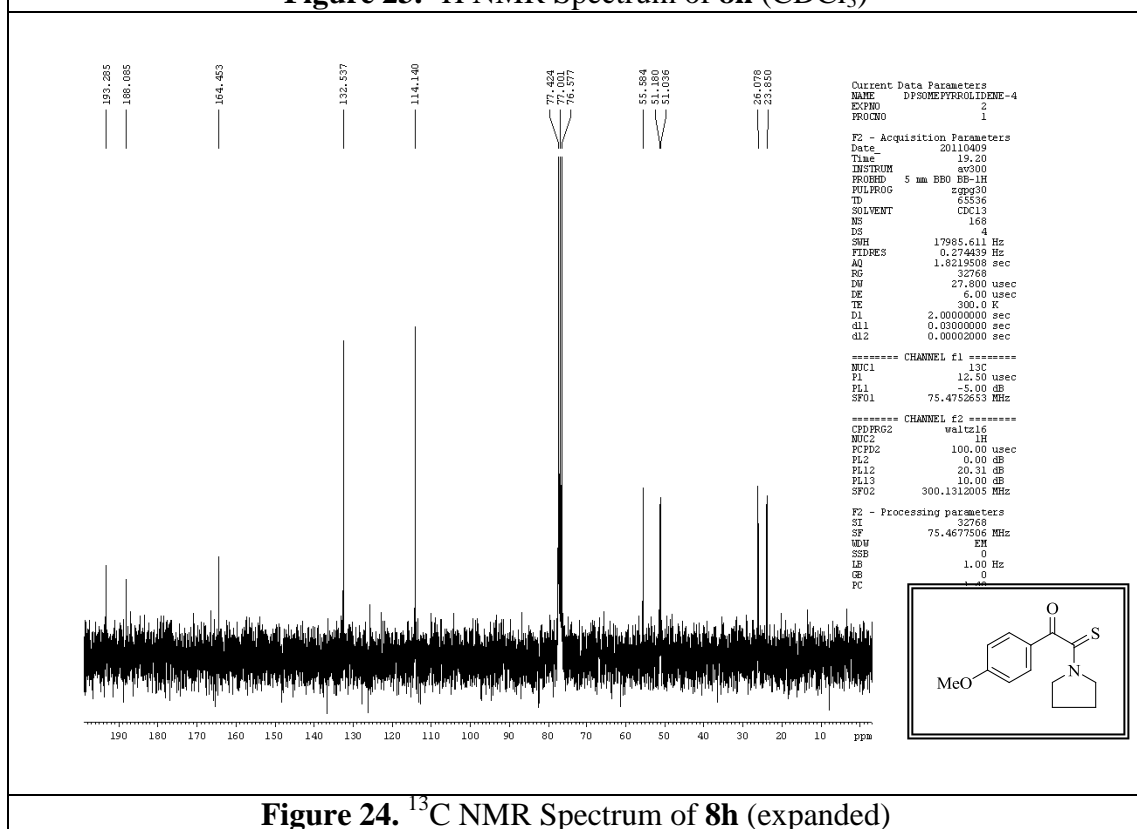

Figure 24.  $^{13}\text{C}$  NMR Spectrum of **8h** (expanded)

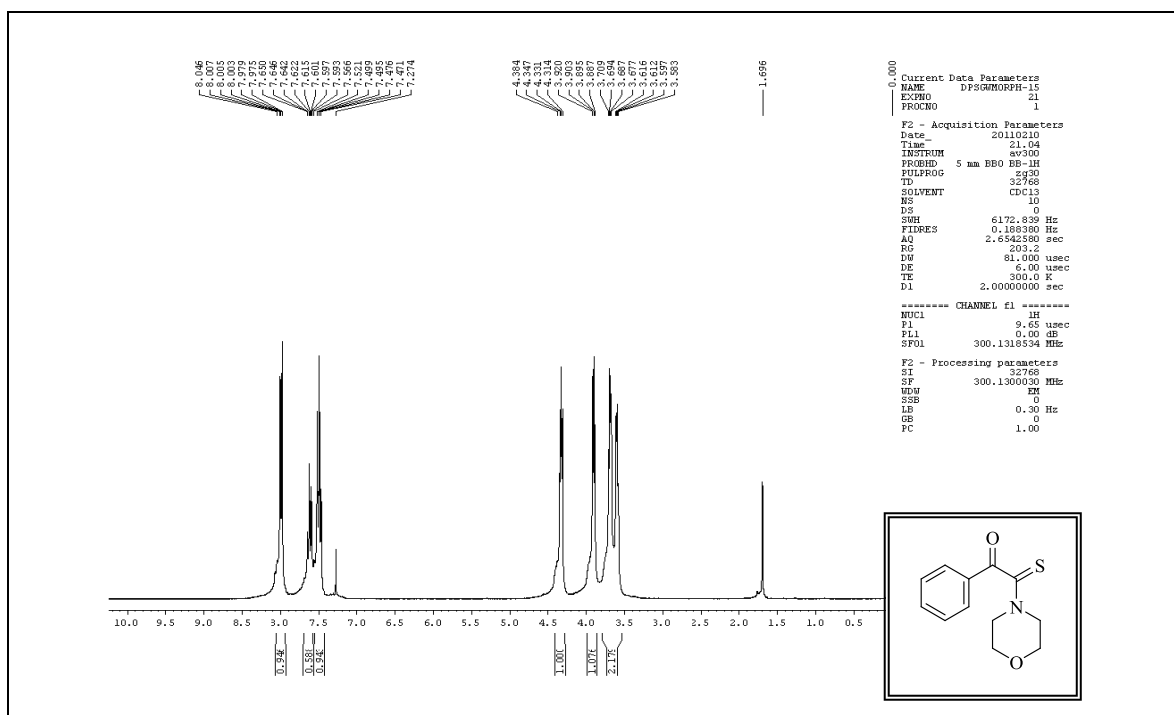

Figure 25.  $^1\text{H}$  NMR Spectrum of **8i** ( $\text{CDCl}_3$ )

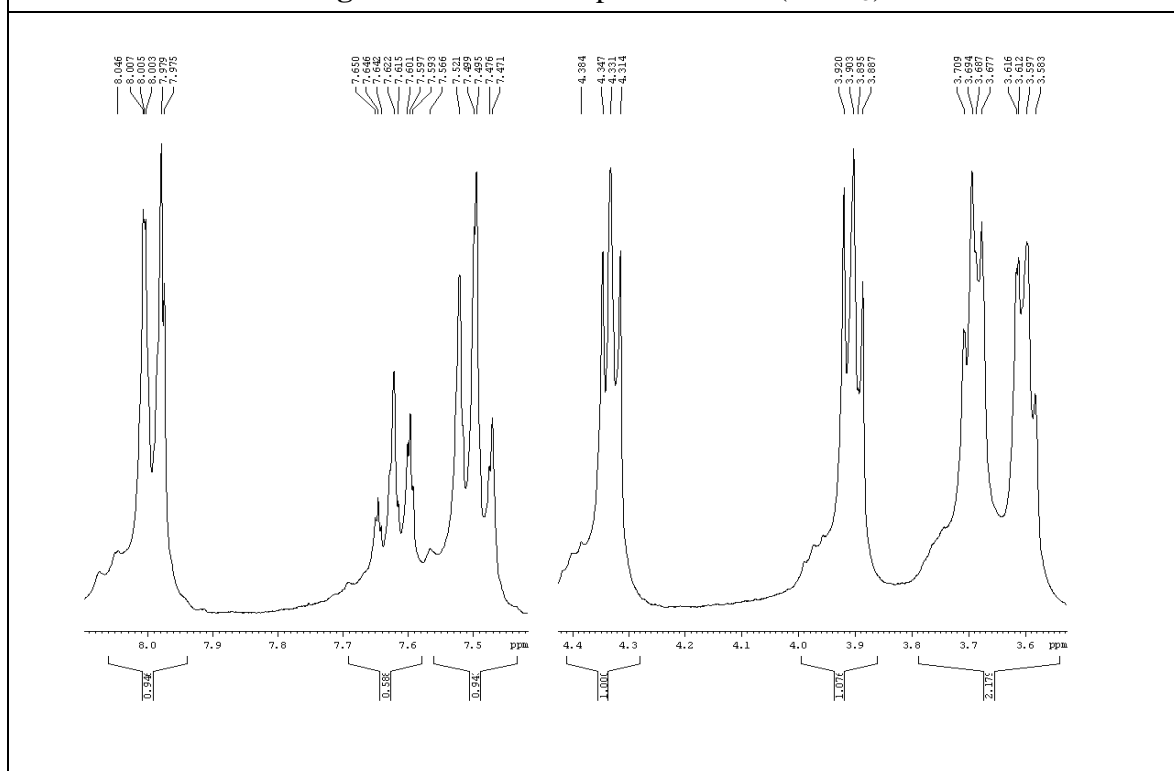

Figure 26.  $^1\text{H}$  NMR Spectrum of **8i** (expanded)



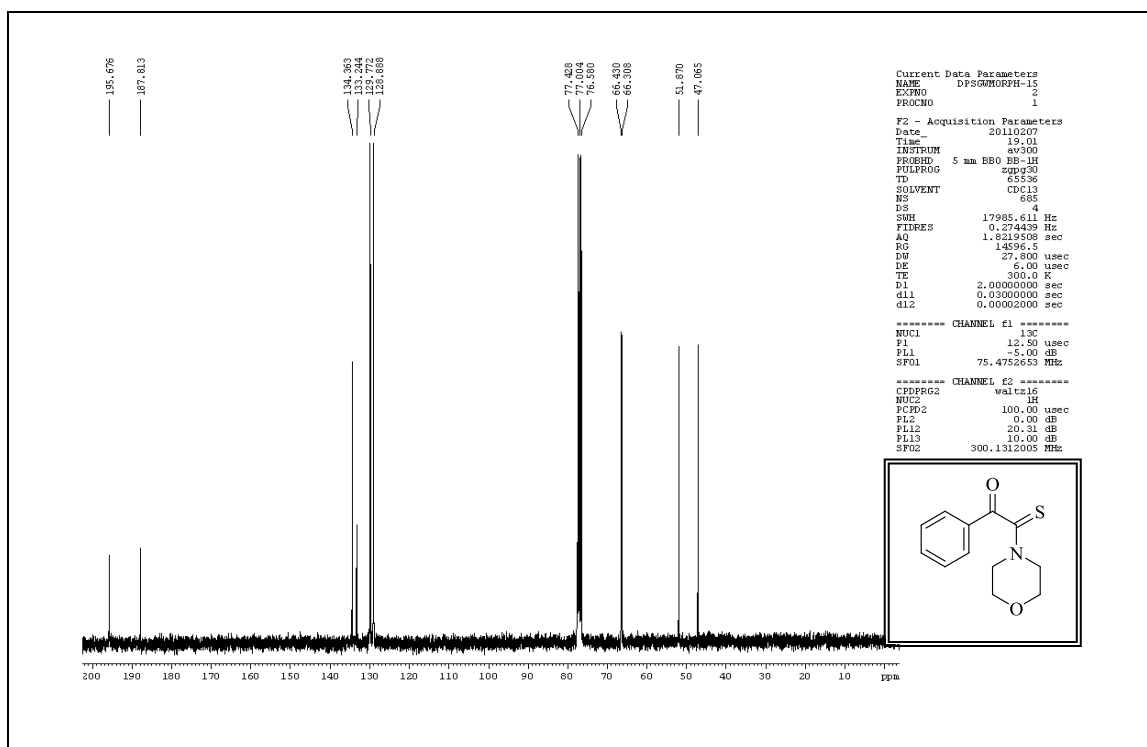

Figure 27.  $^{13}\text{C}$  NMR Spectrum of **8i** ( $\text{CDCl}_3$ )

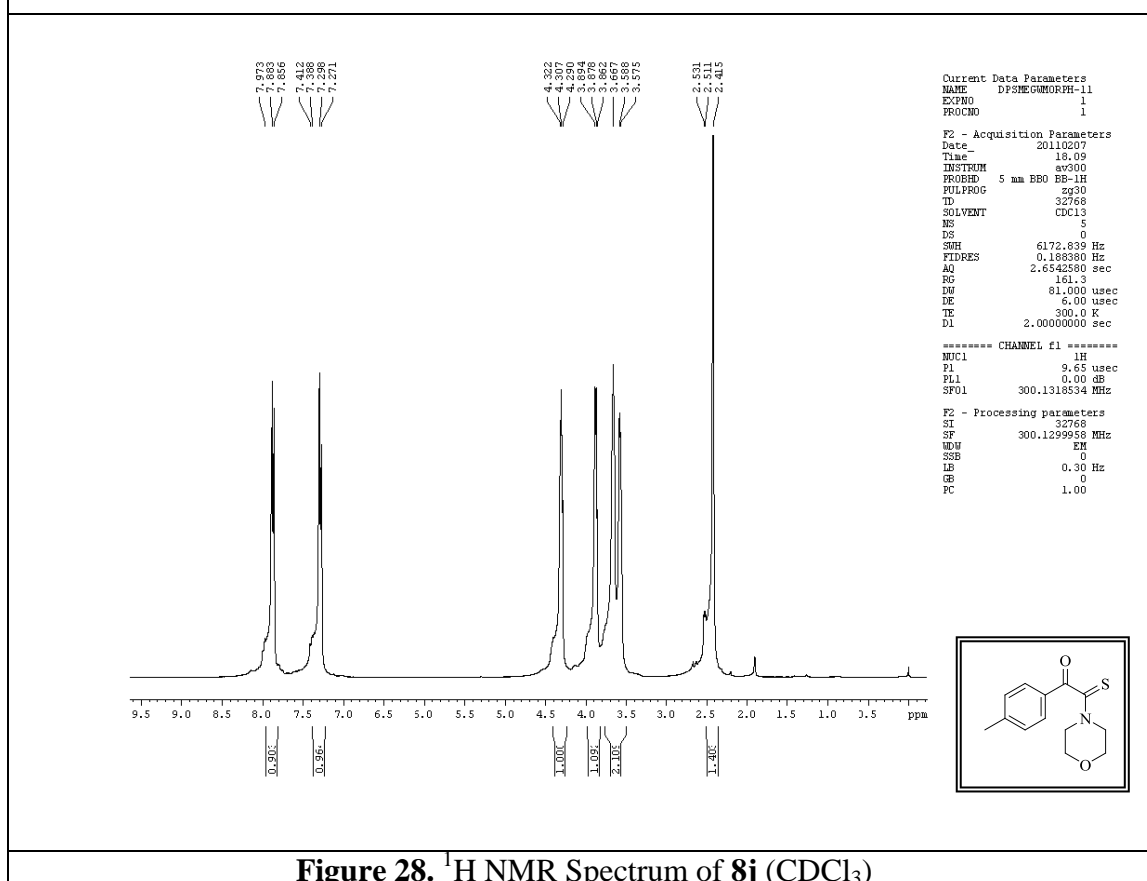

Figure 28.  $^1\text{H}$  NMR Spectrum of **8j** ( $\text{CDCl}_3$ )

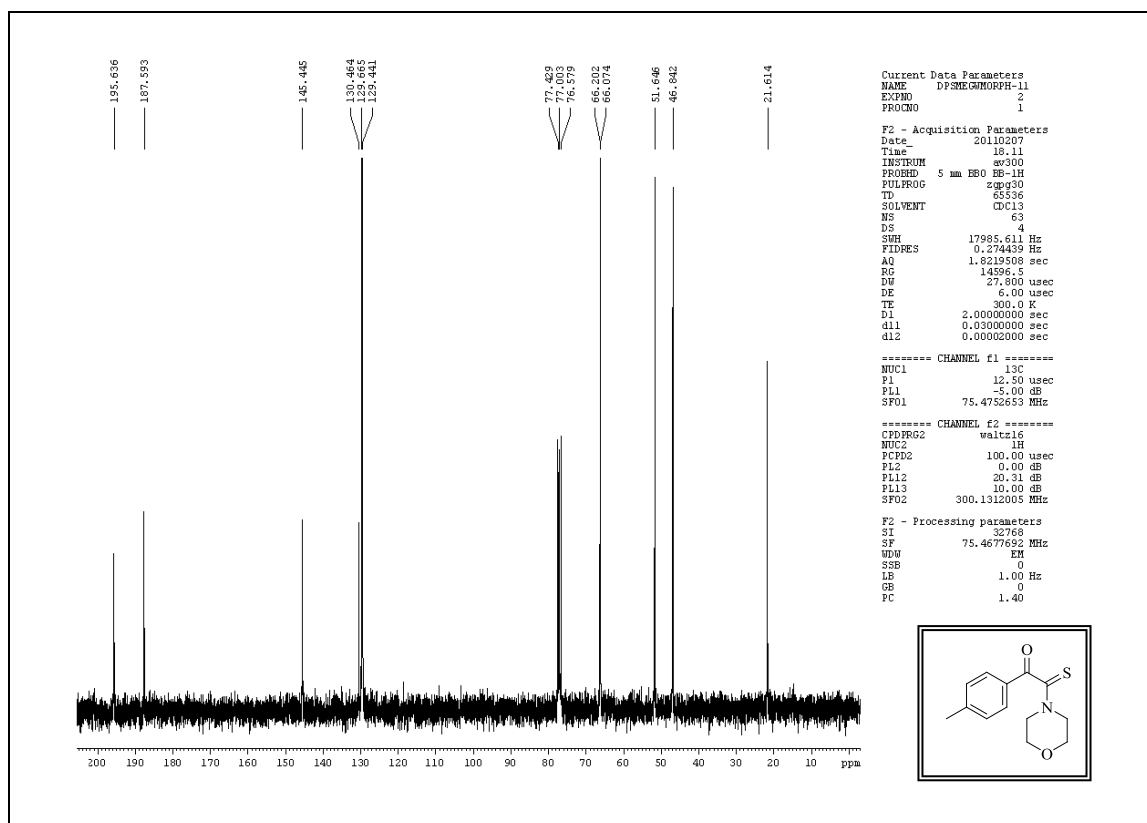

Figure 29.  $^{13}\text{C}$  NMR Spectrum of **8j**

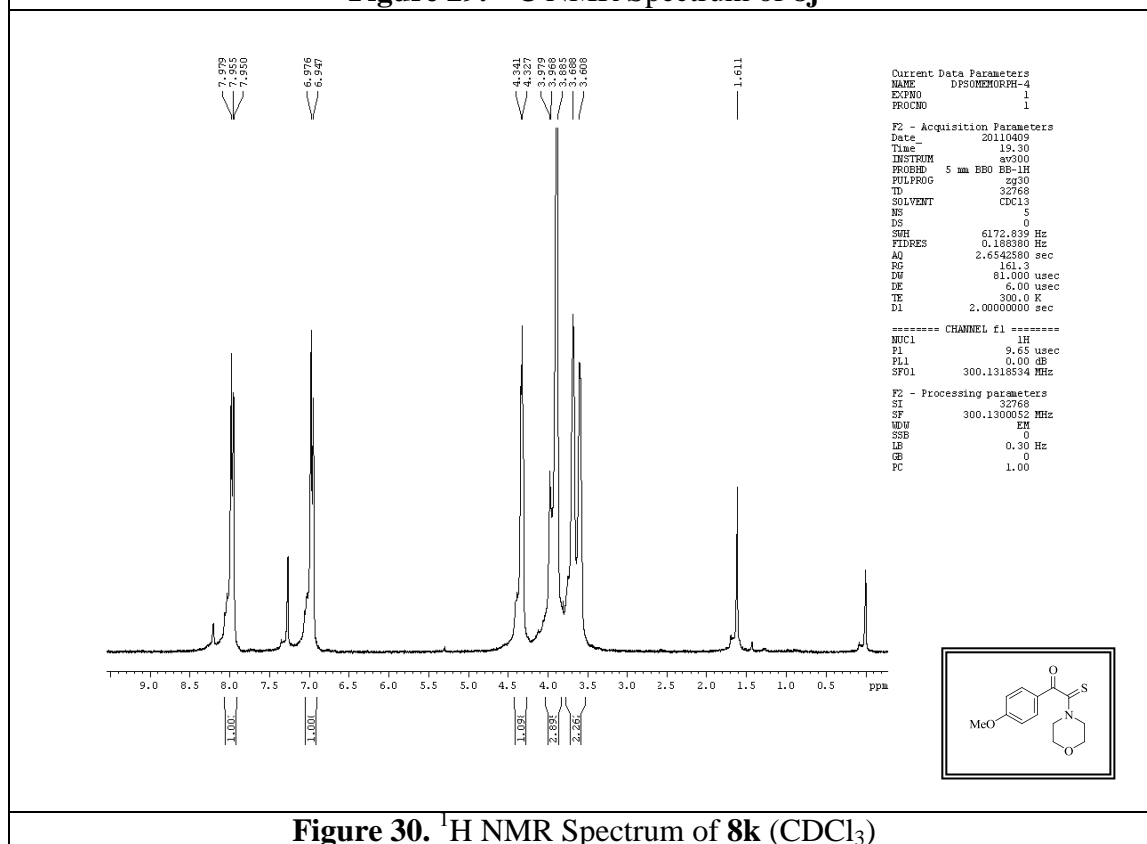

Figure 30.  $^1\text{H}$  NMR Spectrum of **8k** ( $\text{CDCl}_3$ )



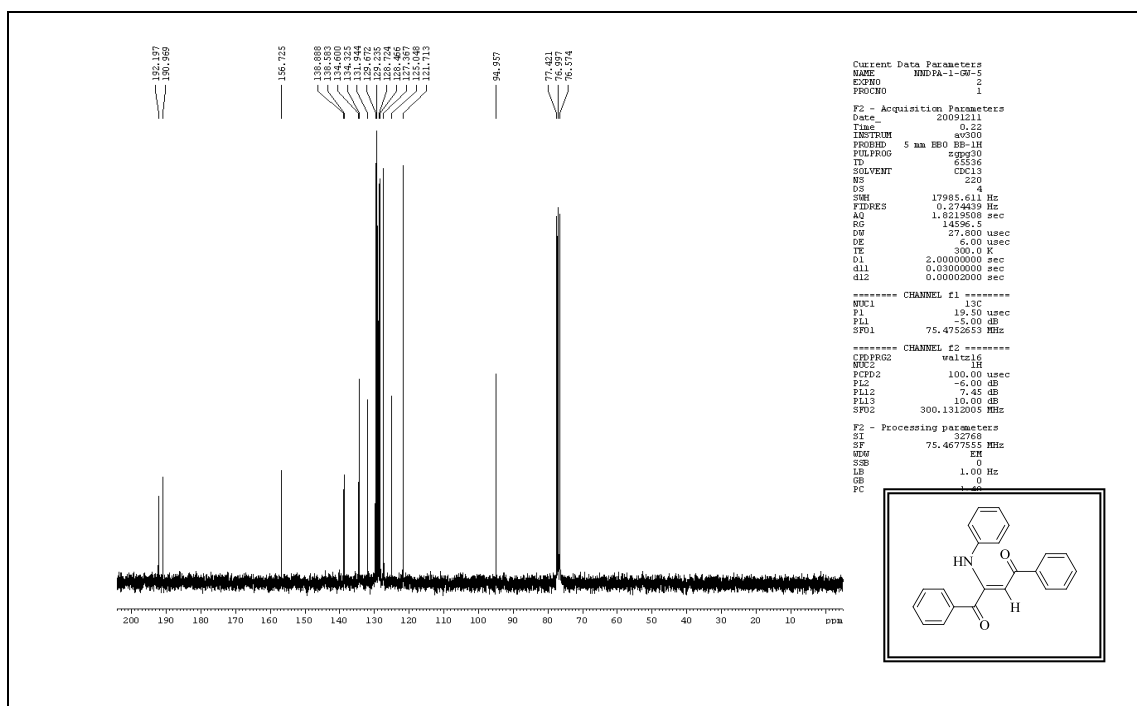

Figure 33.  $^{13}\text{C}$  NMR Spectrum of 5a ( $\text{CDCl}_3$ )

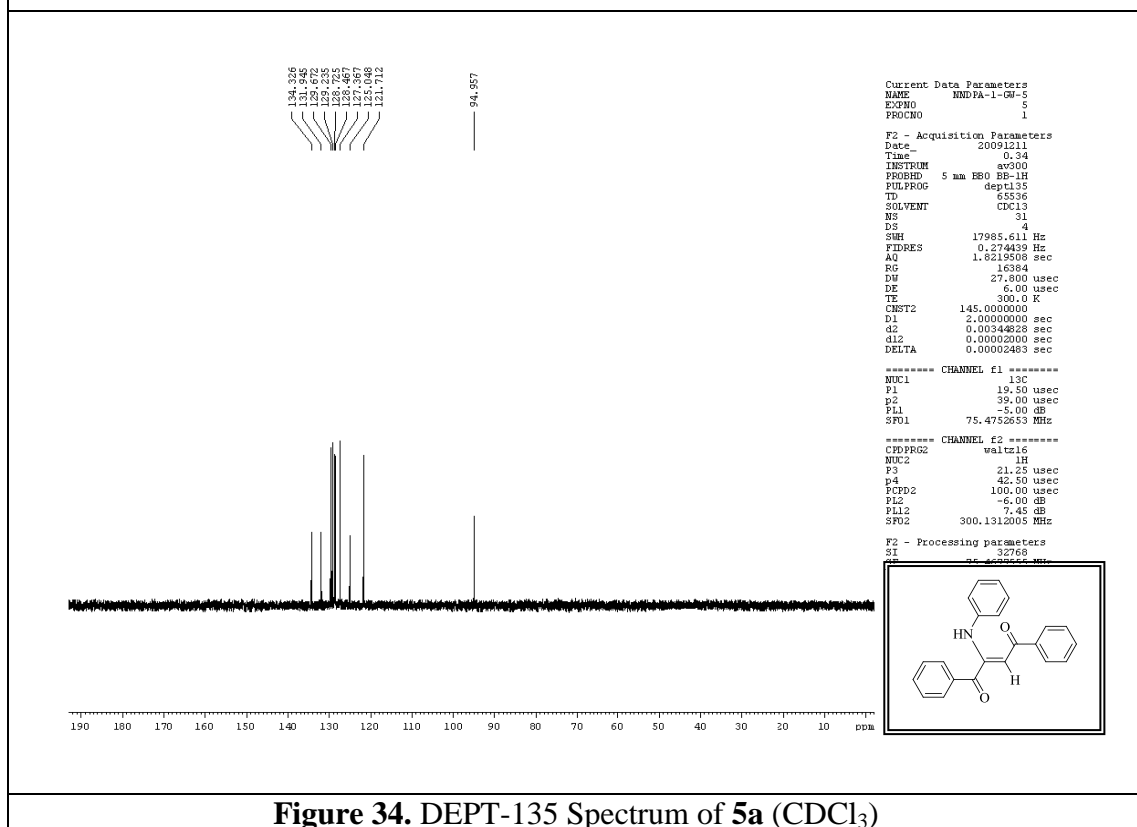

Figure 34. DEPT-135 Spectrum of 5a ( $\text{CDCl}_3$ )

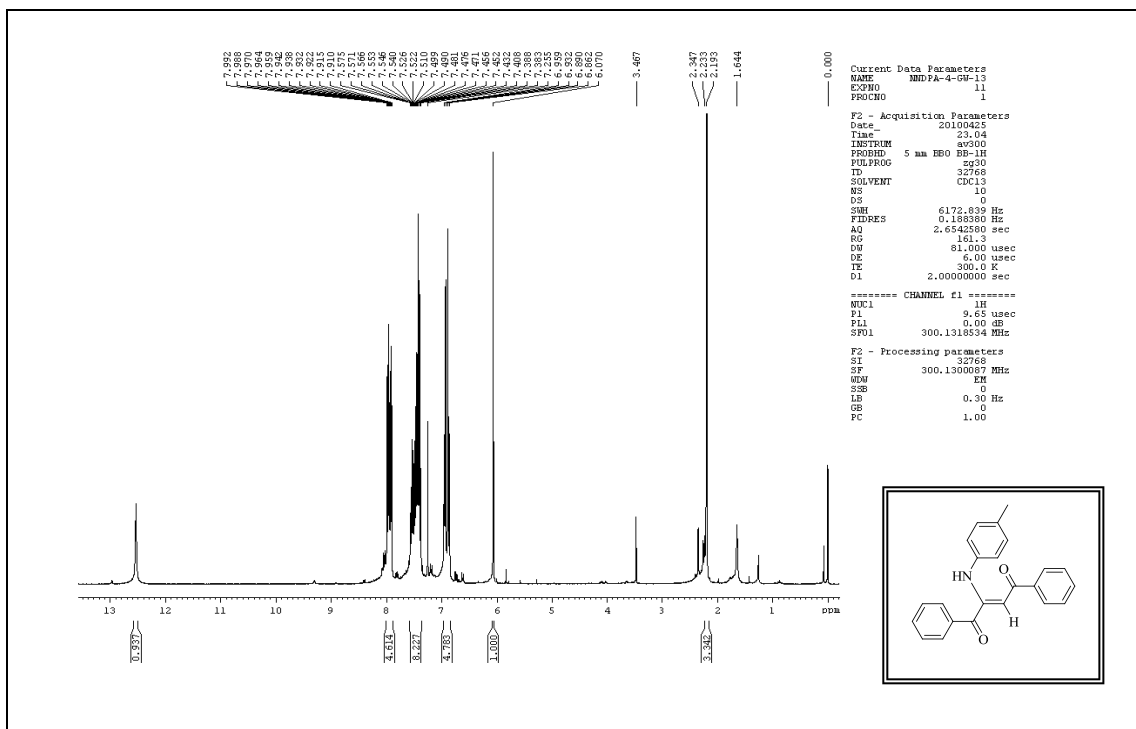

Figure 35. <sup>1</sup>H NMR Spectrum of 5b

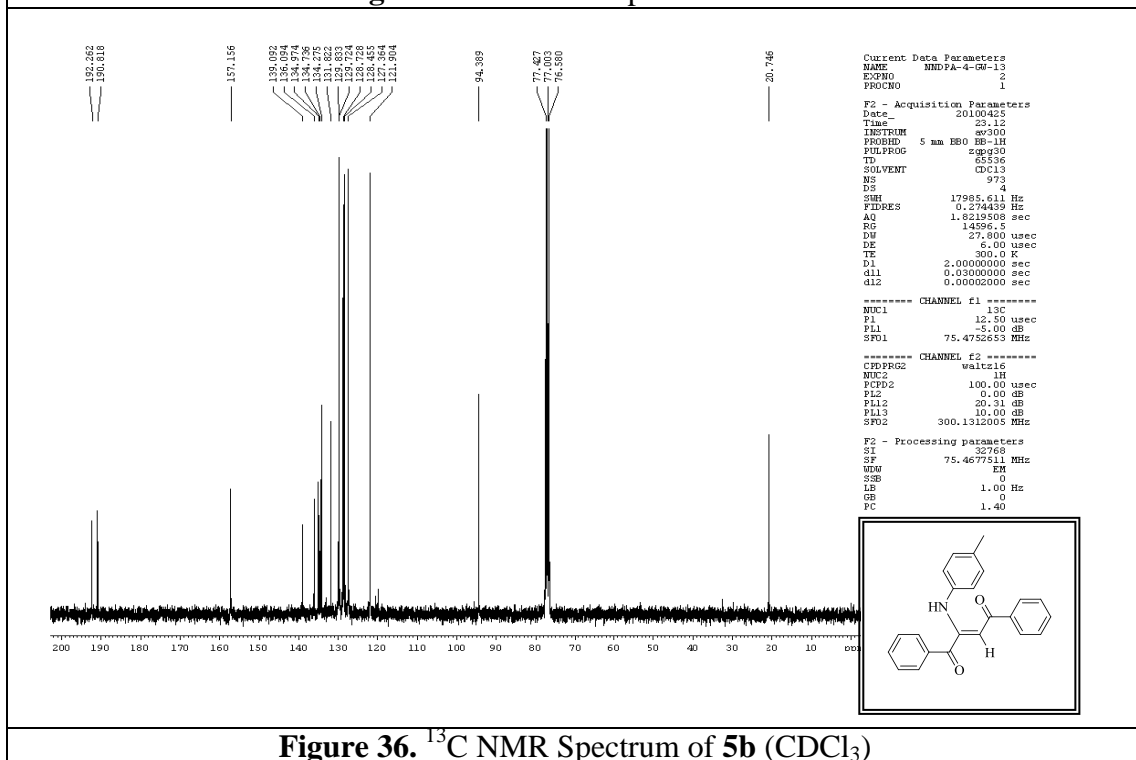

Figure 36. <sup>13</sup>C NMR Spectrum of 5b (CDCl<sub>3</sub>)

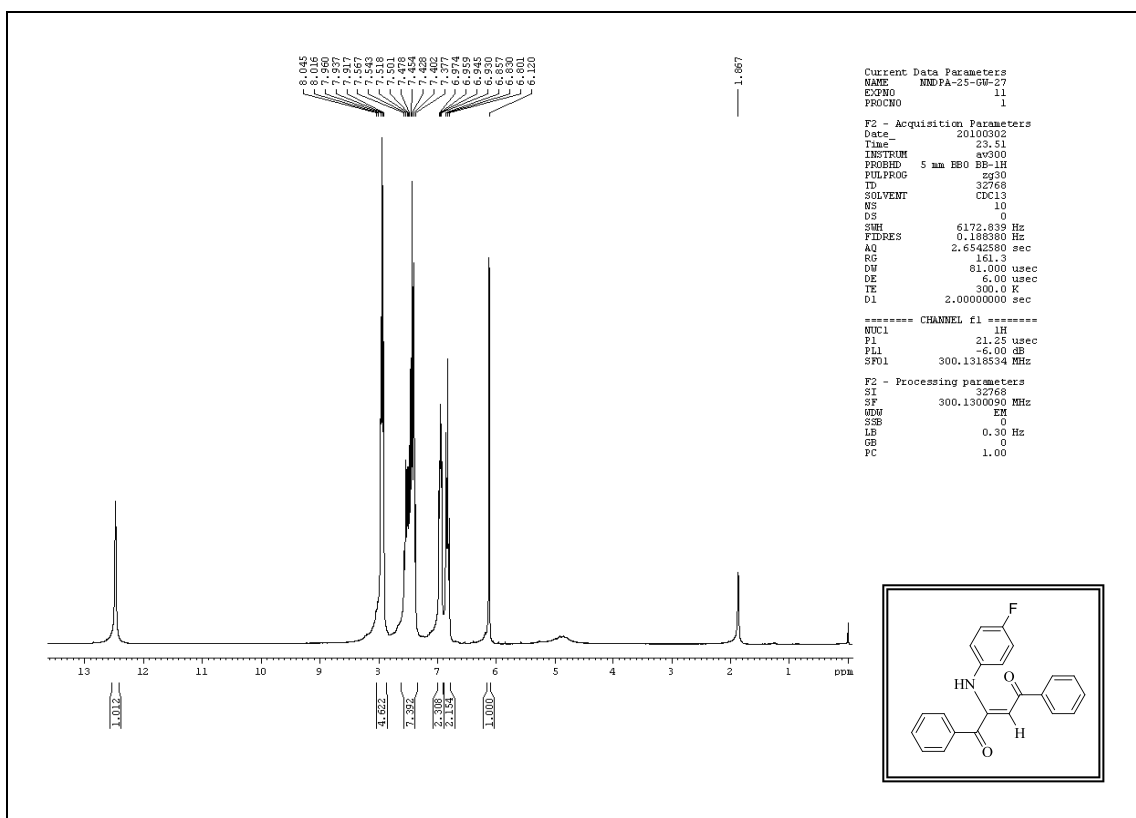

Figure 37. <sup>1</sup>H NMR Spectrum of 5c

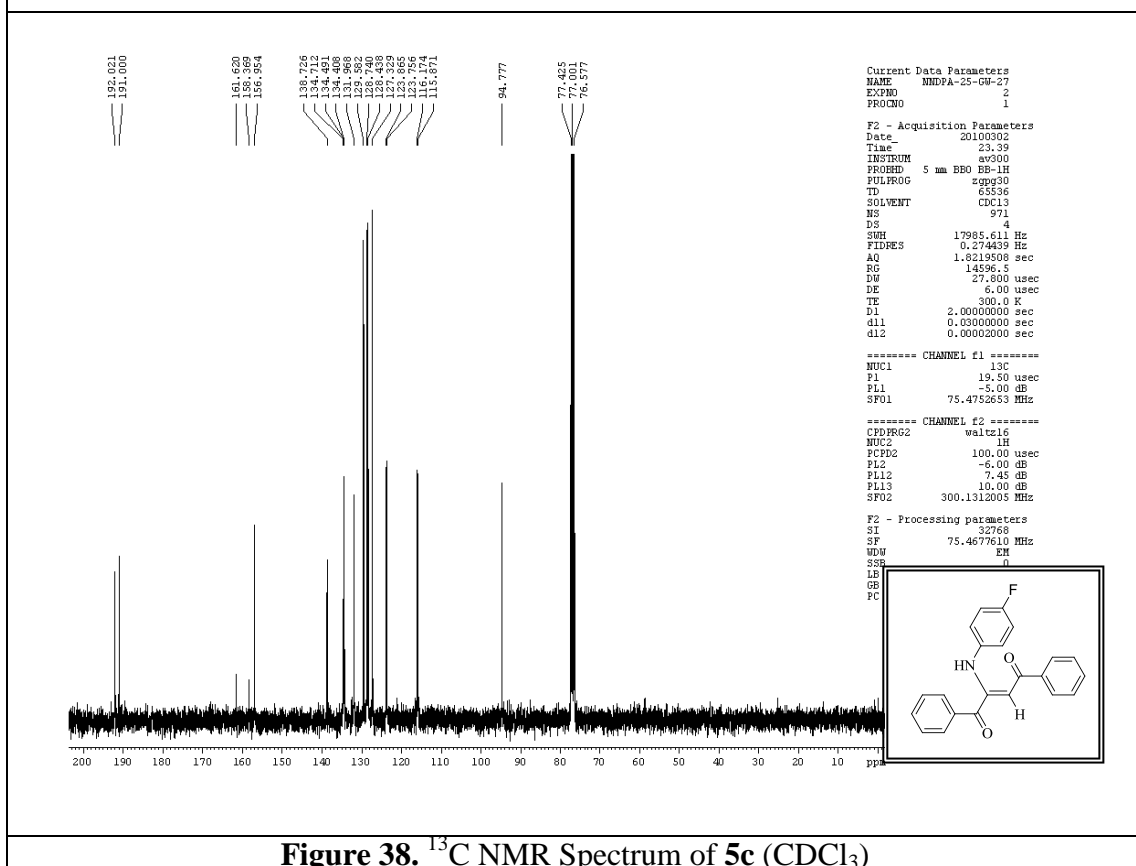

Figure 38. <sup>13</sup>C NMR Spectrum of 5c (CDCl<sub>3</sub>)

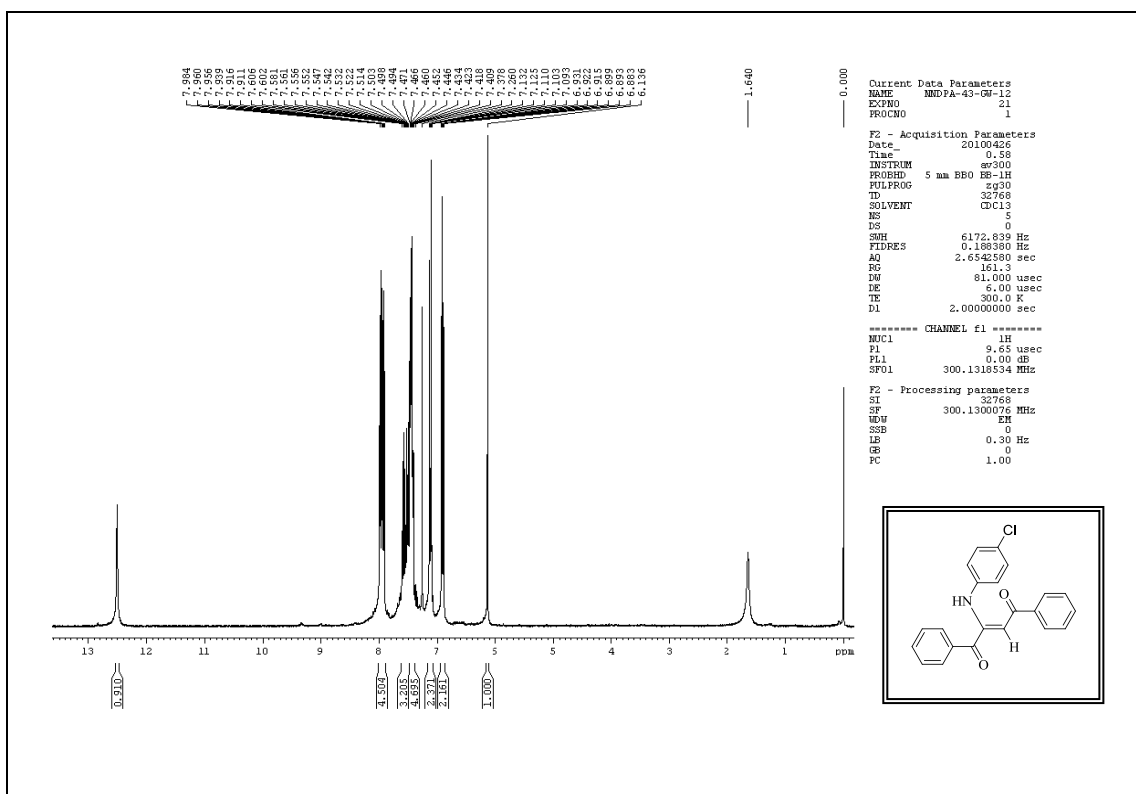

Figure 39. <sup>1</sup>H NMR Spectrum of 5d

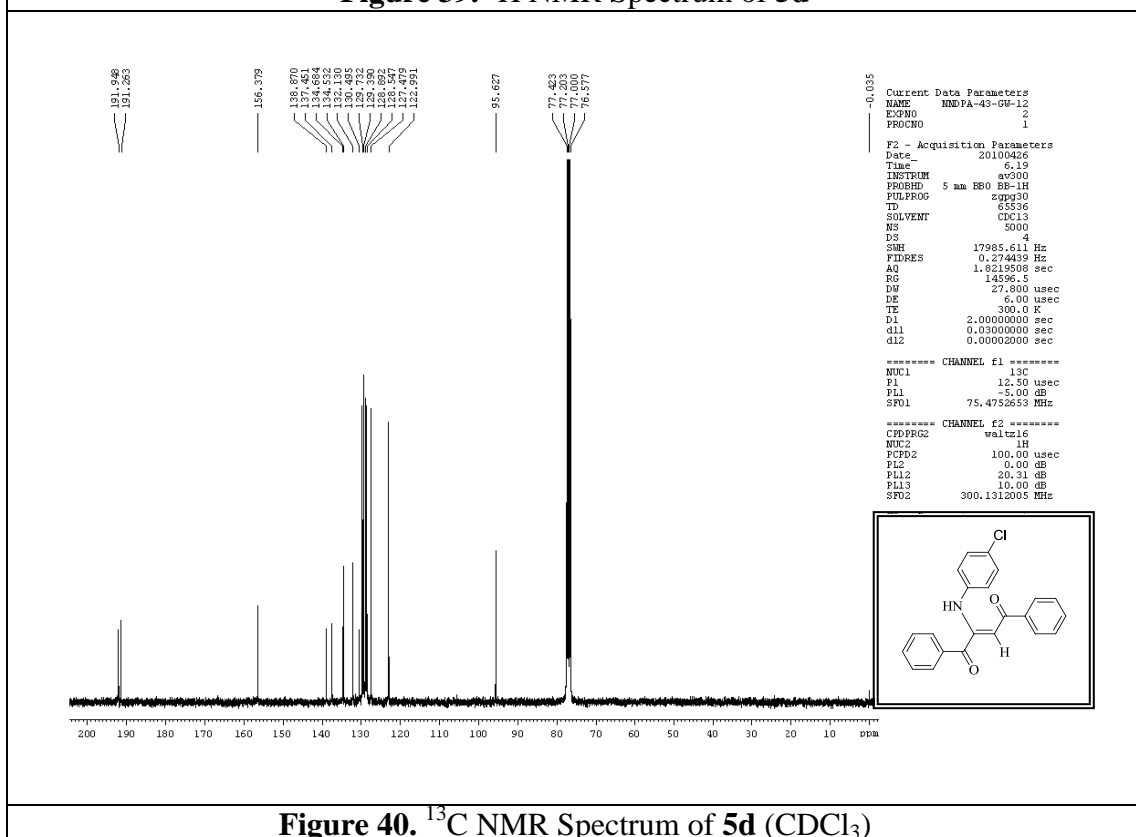

Figure 40. <sup>13</sup>C NMR Spectrum of 5d (CDCl<sub>3</sub>)

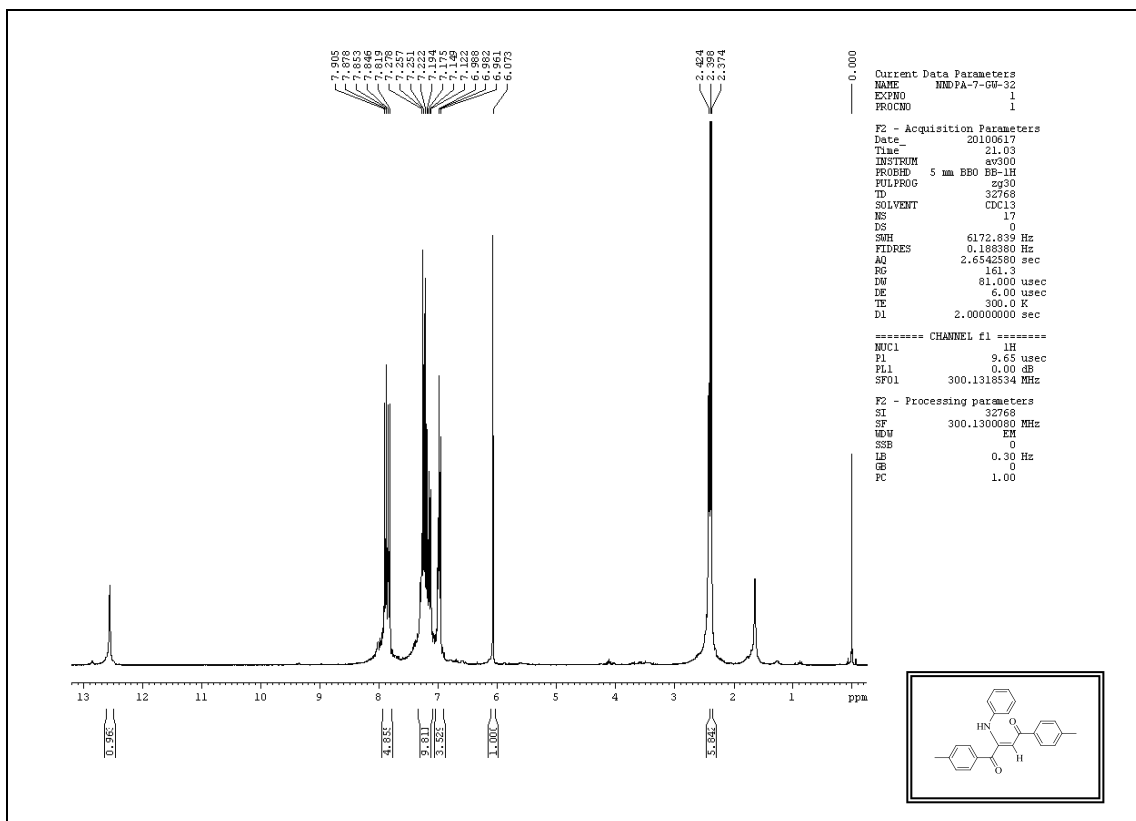

**Figure 41.**  $^1\text{H}$  NMR Spectrum of **5e** ( $\text{CDCl}_3$ )

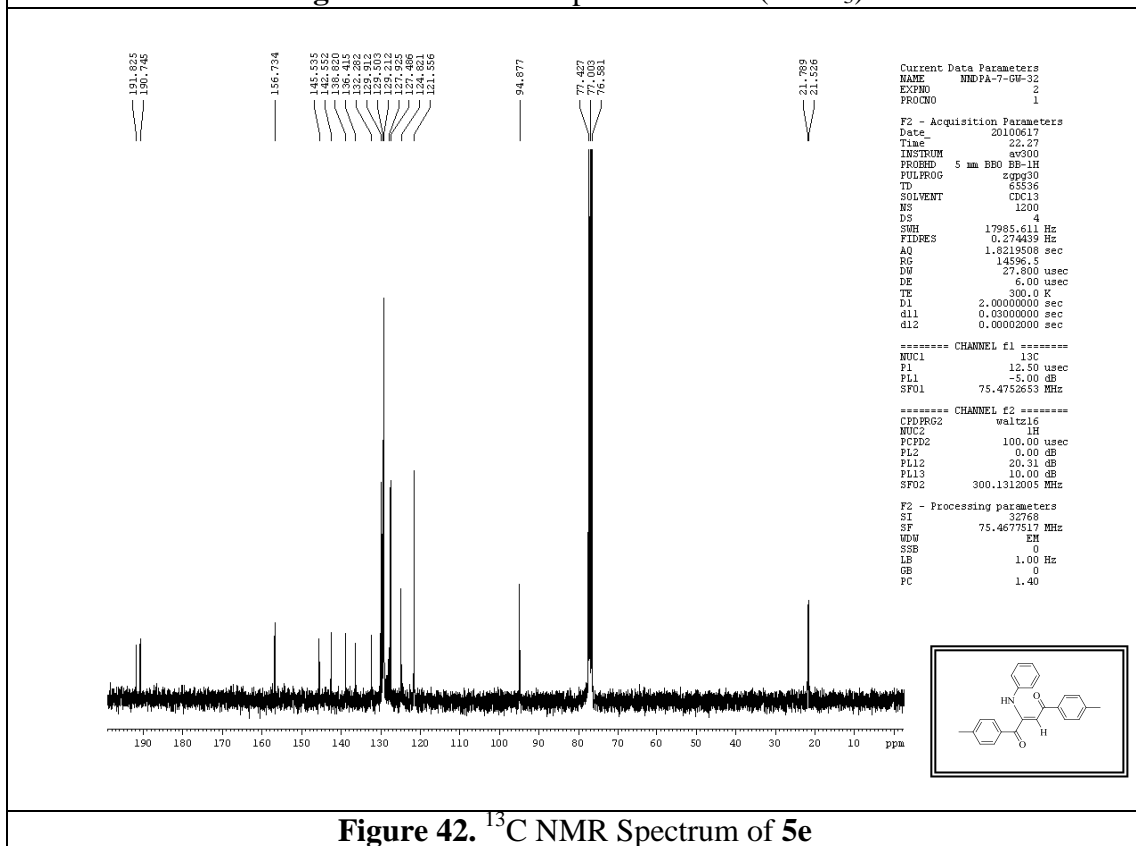

**Figure 42.**  $^{13}\text{C}$  NMR Spectrum of **5e**



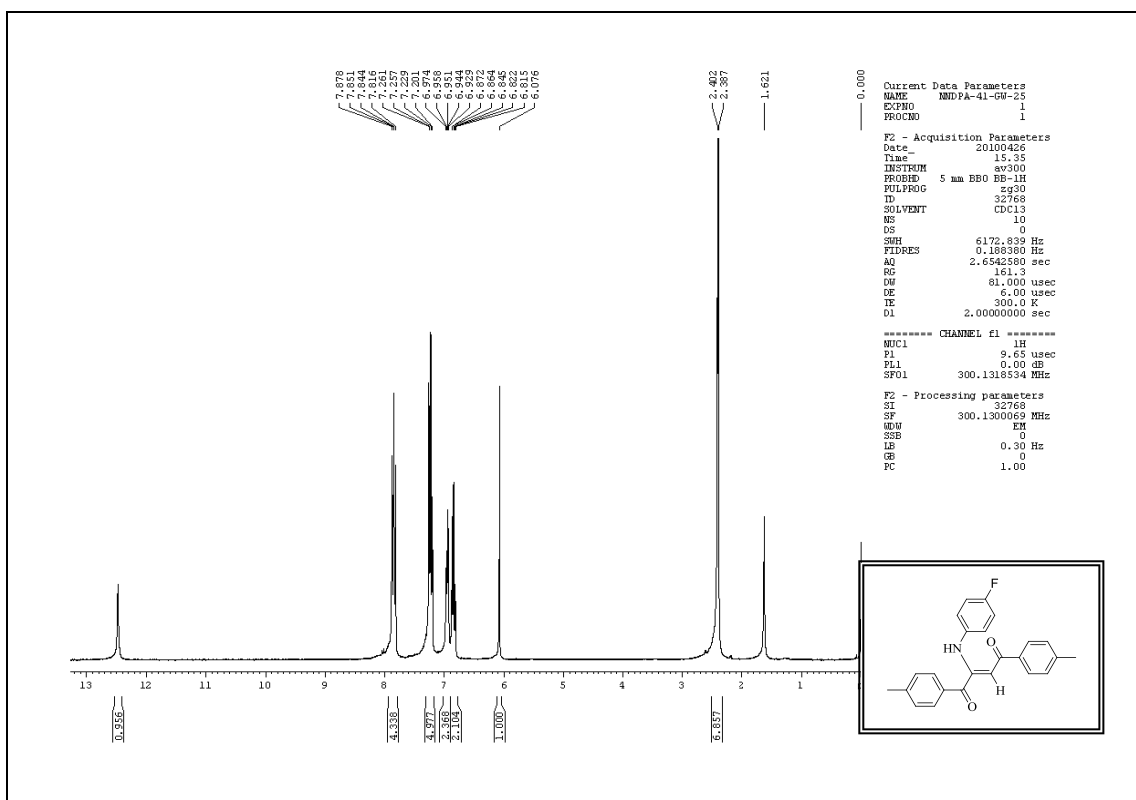

Figure 43. <sup>1</sup>H NMR Spectrum of 5f

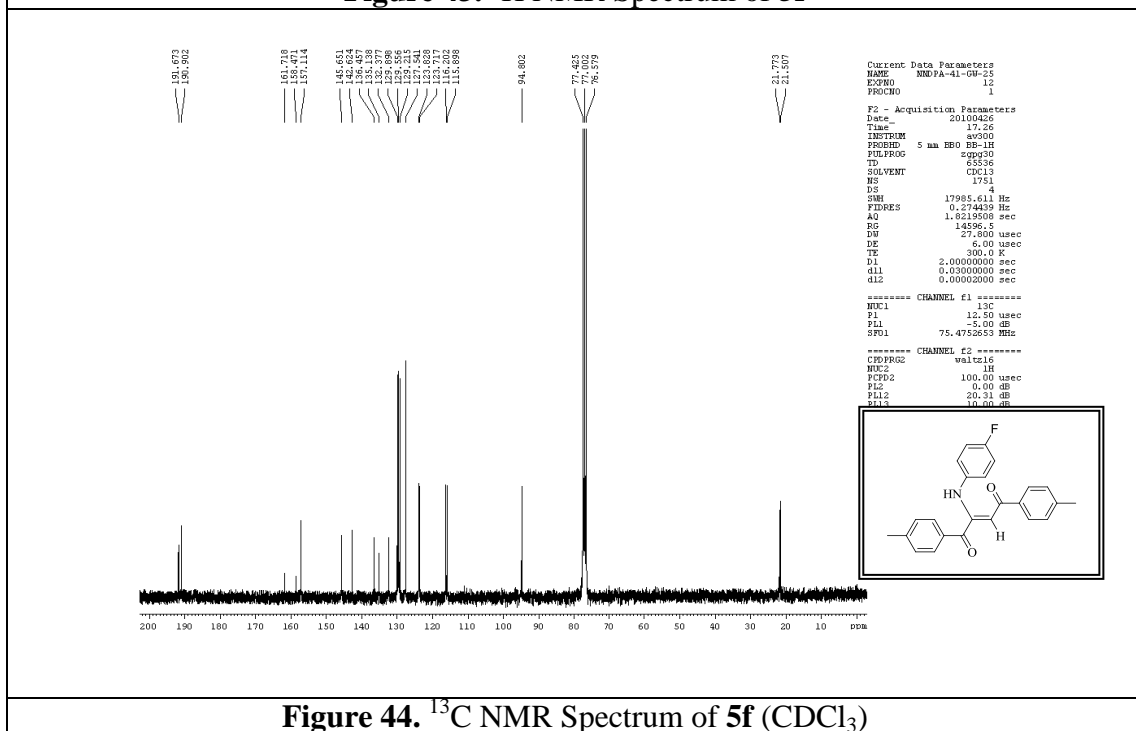

Figure 44. <sup>13</sup>C NMR Spectrum of 5f (CDCl<sub>3</sub>)

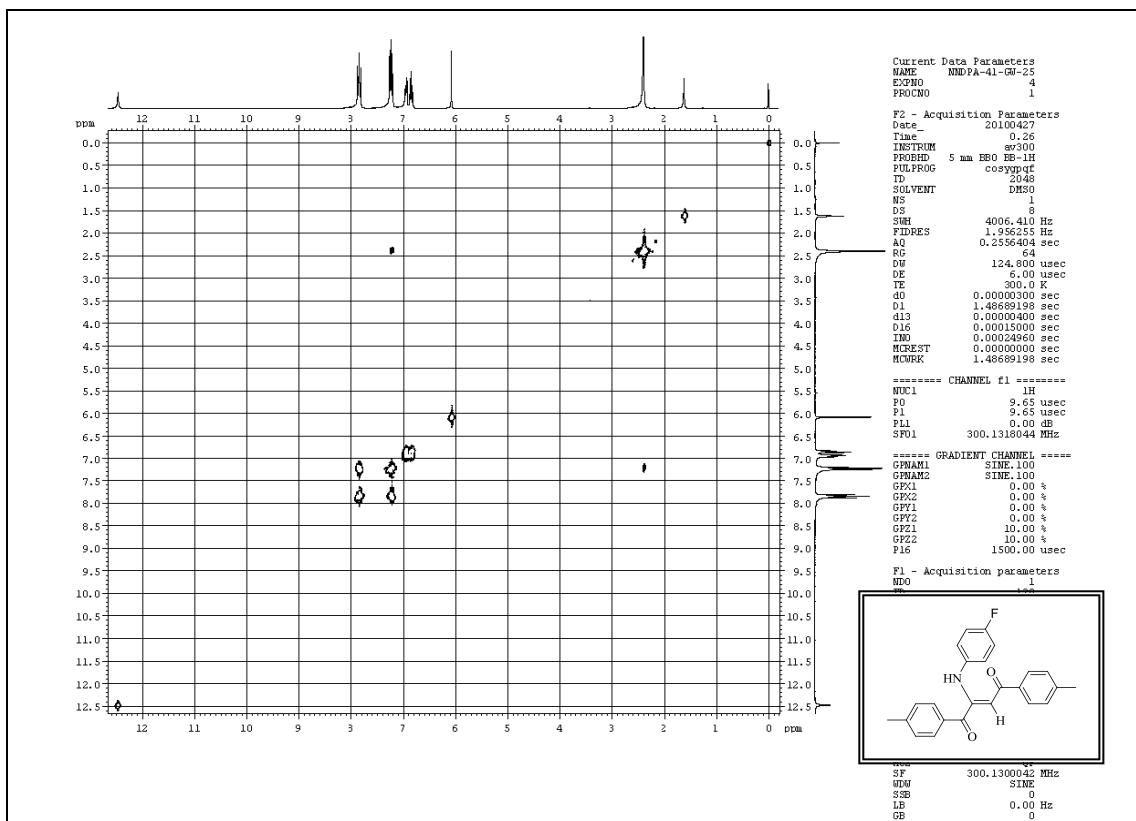

Figure 45. H,H-COSY Spectrum of **5f**

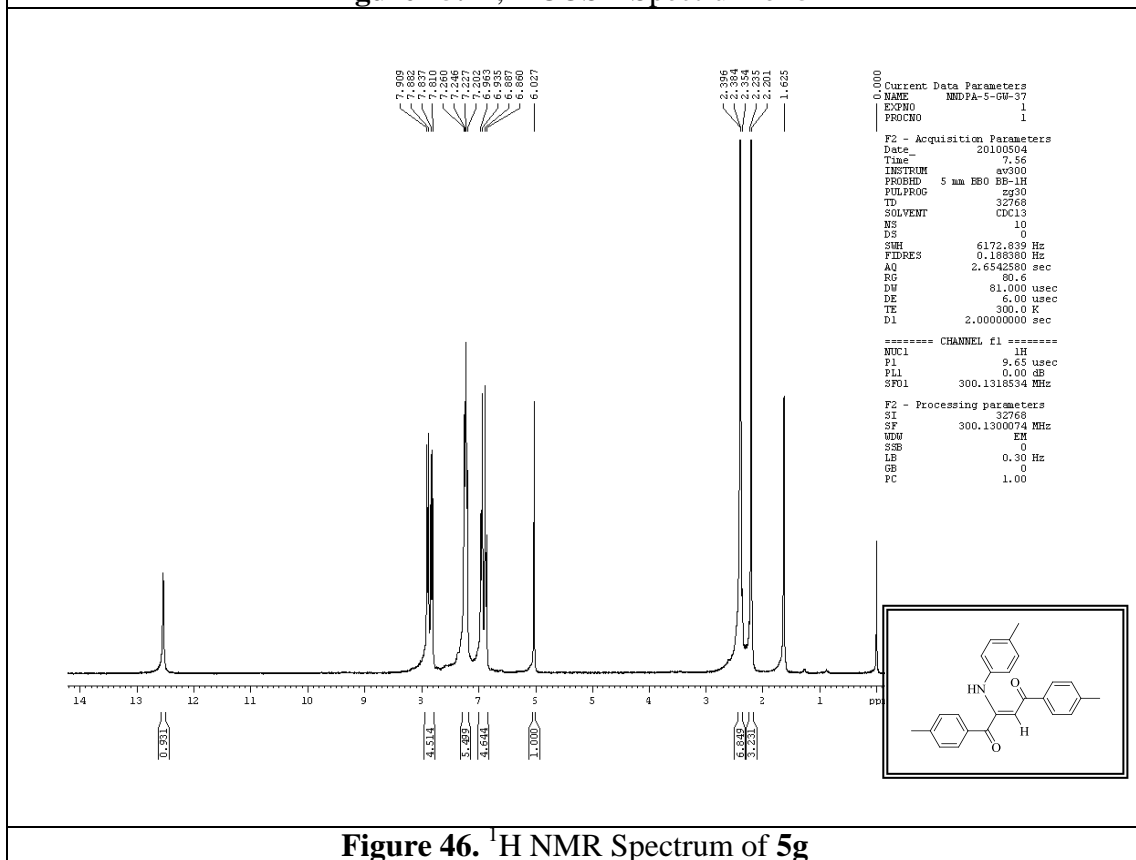

Figure 46. <sup>1</sup>H NMR Spectrum of **5g**

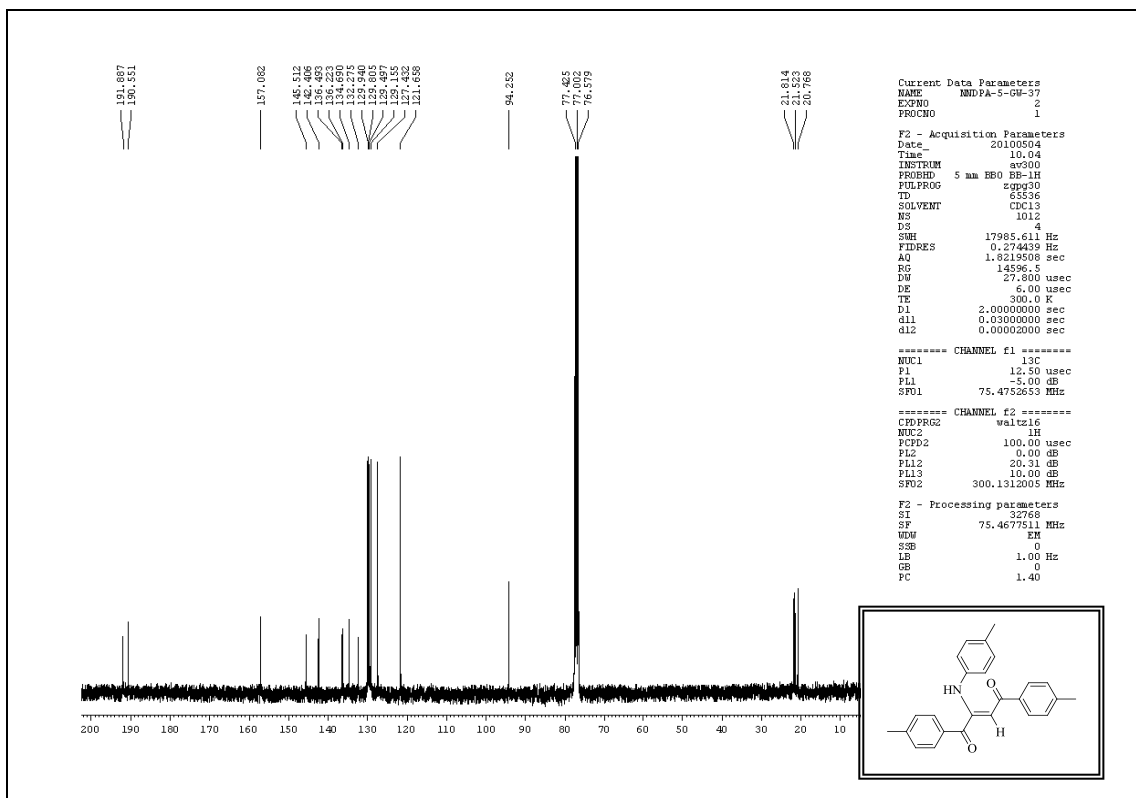

Figure 47. <sup>13</sup>C NMR Spectrum of **5g** (CDCl<sub>3</sub>)

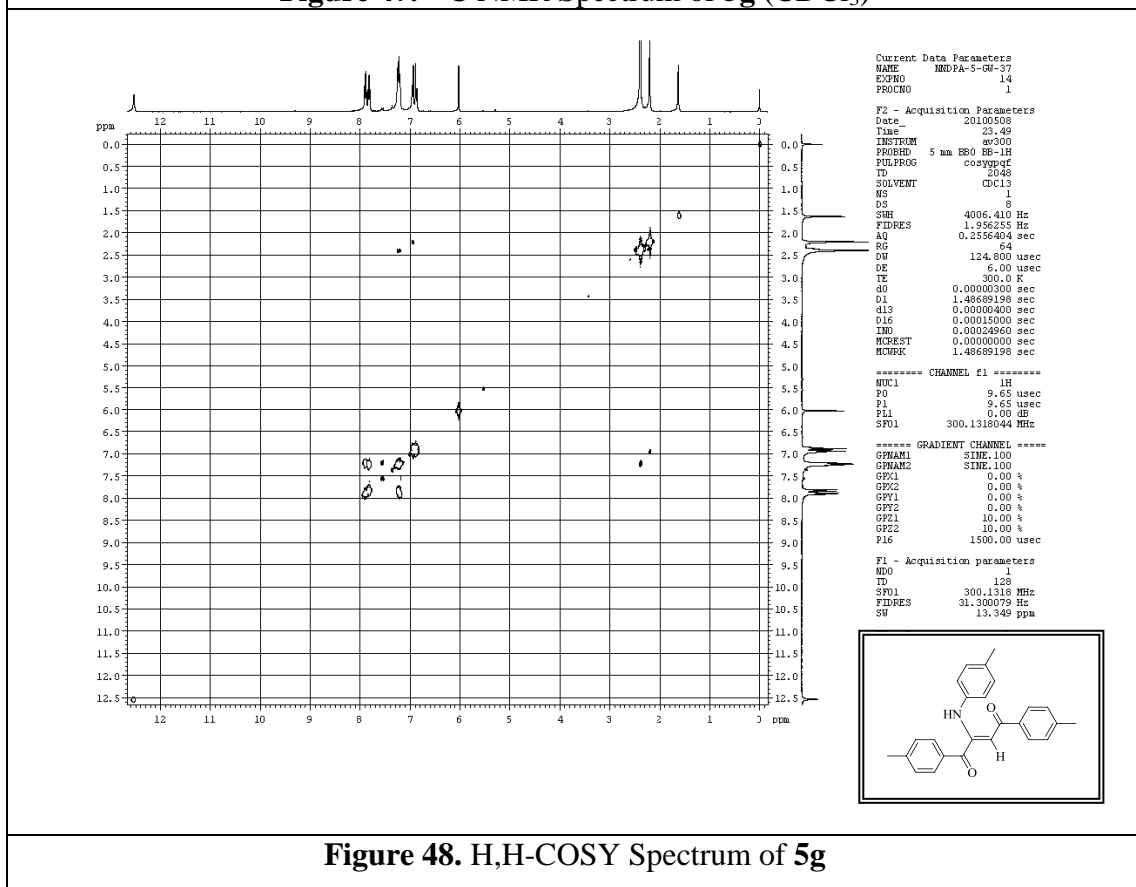

Figure 48. H,H-COSY Spectrum of **5g**

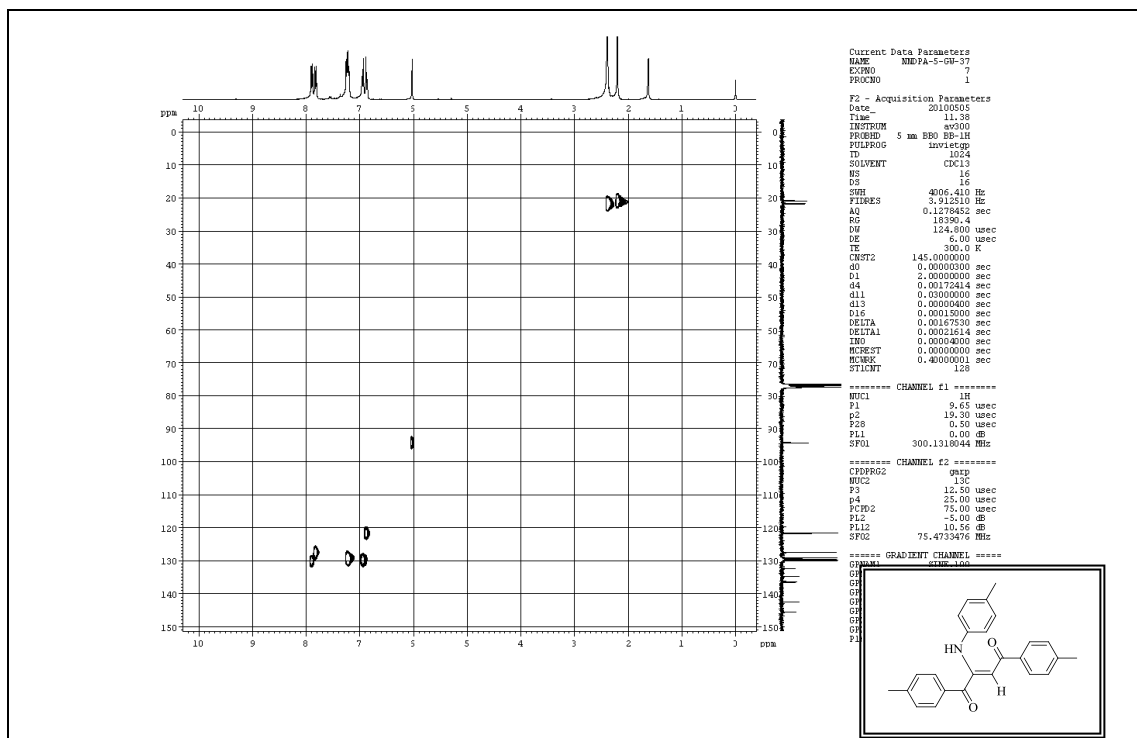

Figure 49. C,H-COSY Spectrum of **5g**

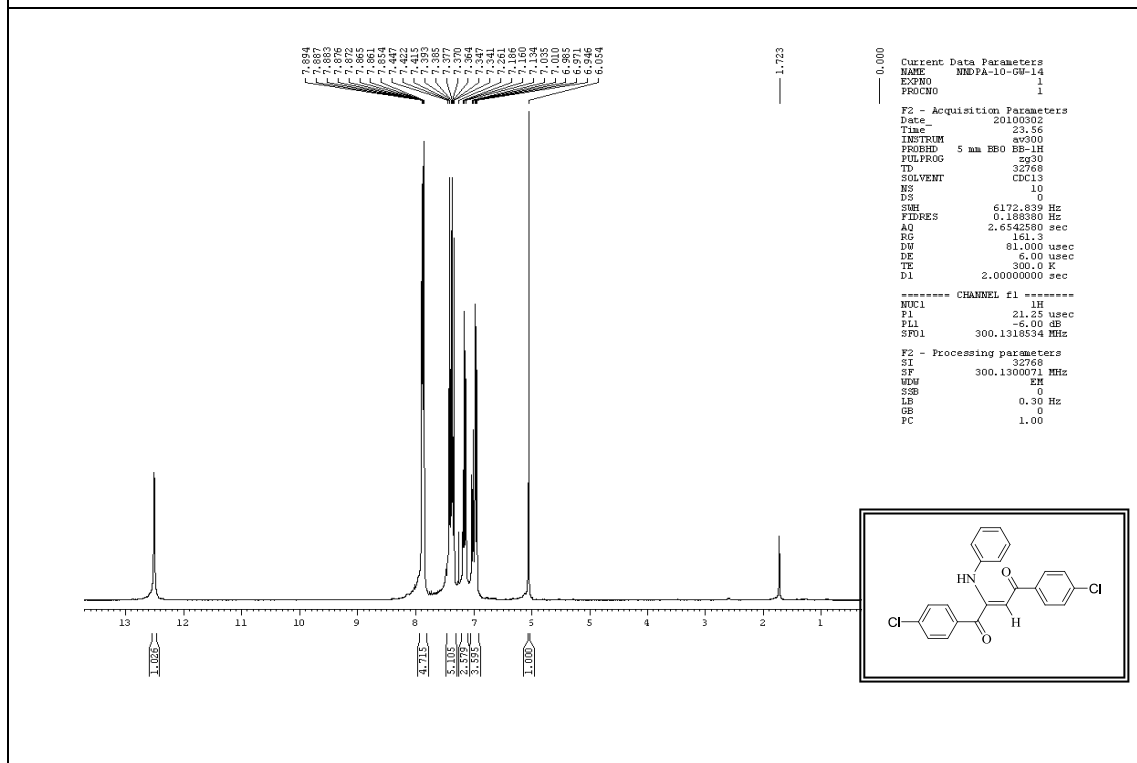

Figure 50. <sup>1</sup>H NMR Spectrum of **5h**

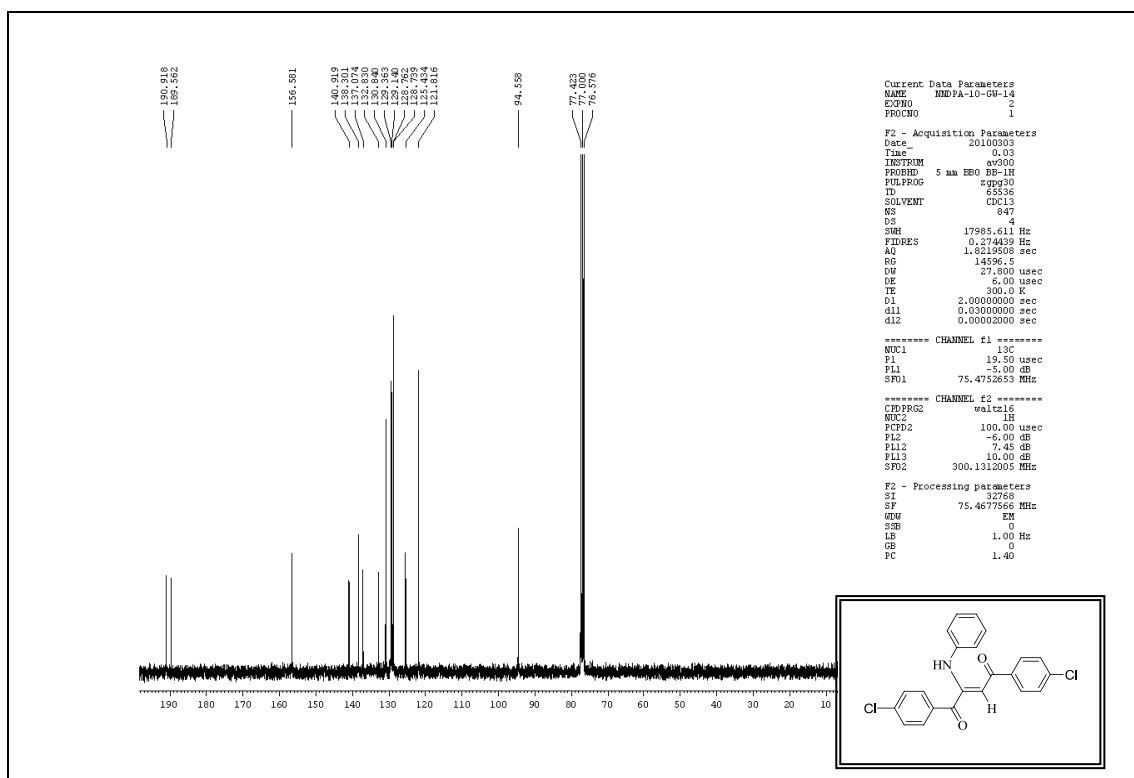

Figure 51.  $^{13}\text{C}$  NMR Spectrum of **5h** ( $\text{CDCl}_3$ )

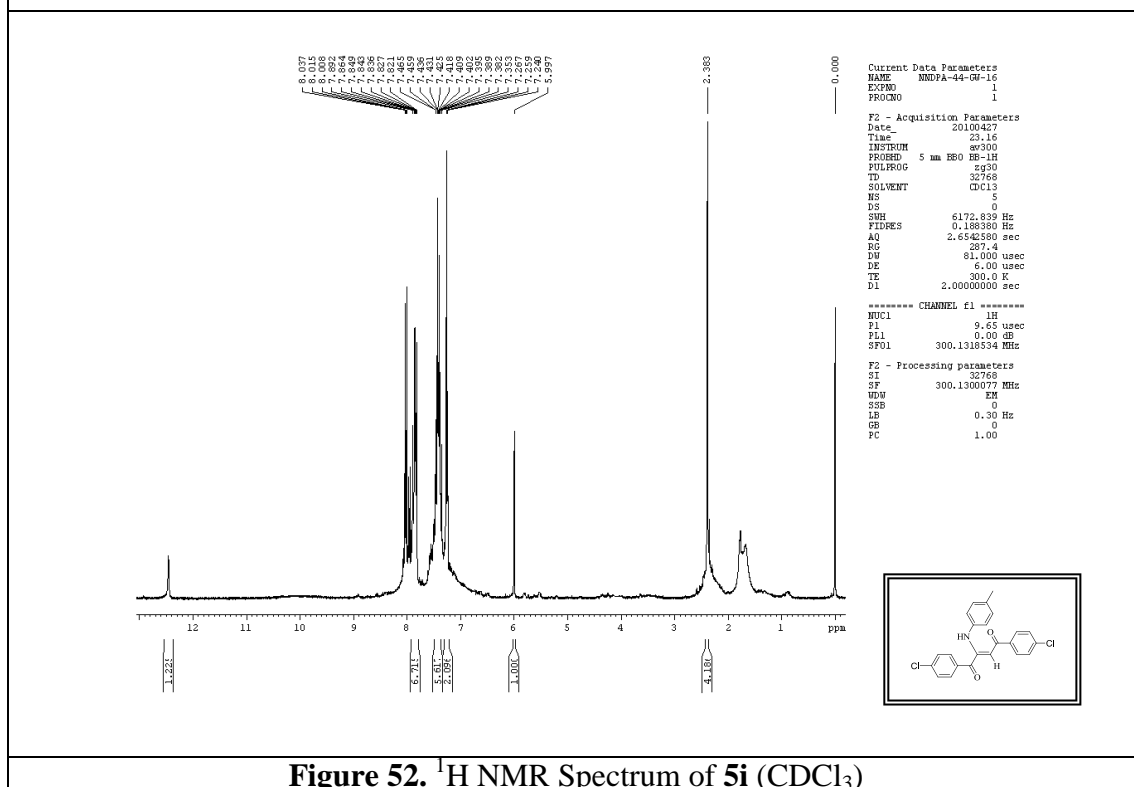

Figure 52.  $^1\text{H}$  NMR Spectrum of **5i** ( $\text{CDCl}_3$ )

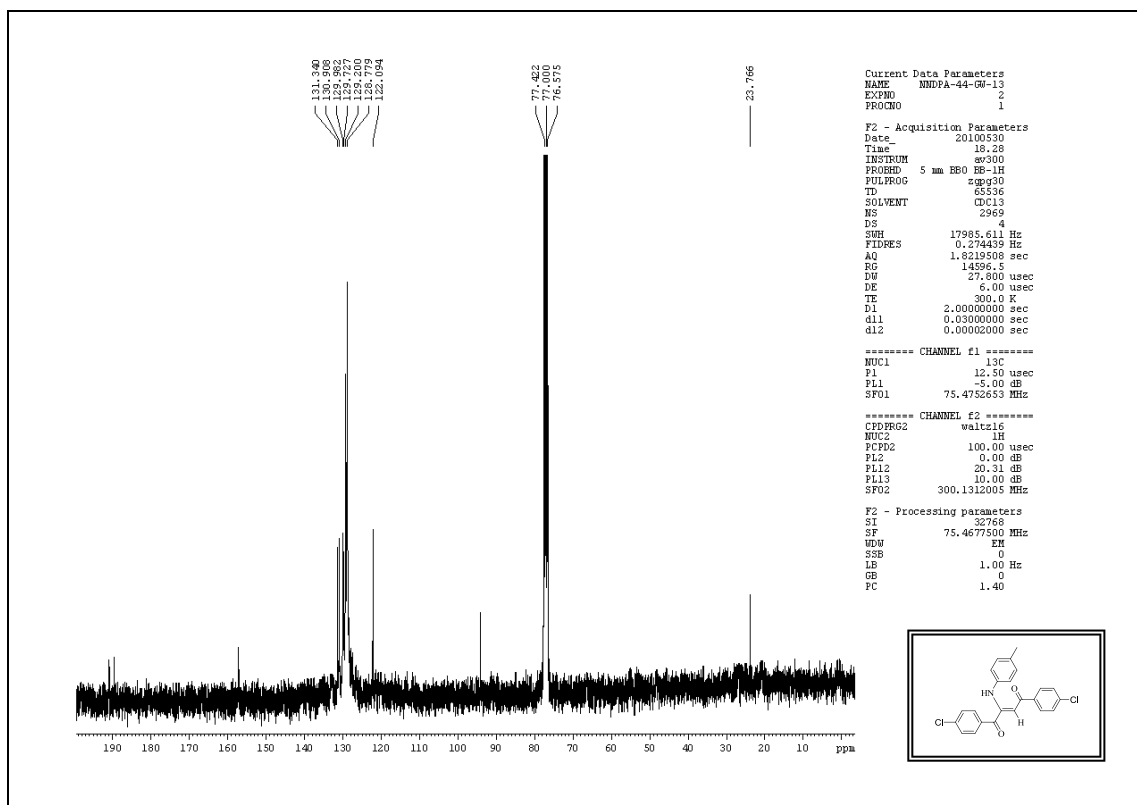

Figure 53.  $^{13}\text{C}$  NMR Spectrum of **5i**

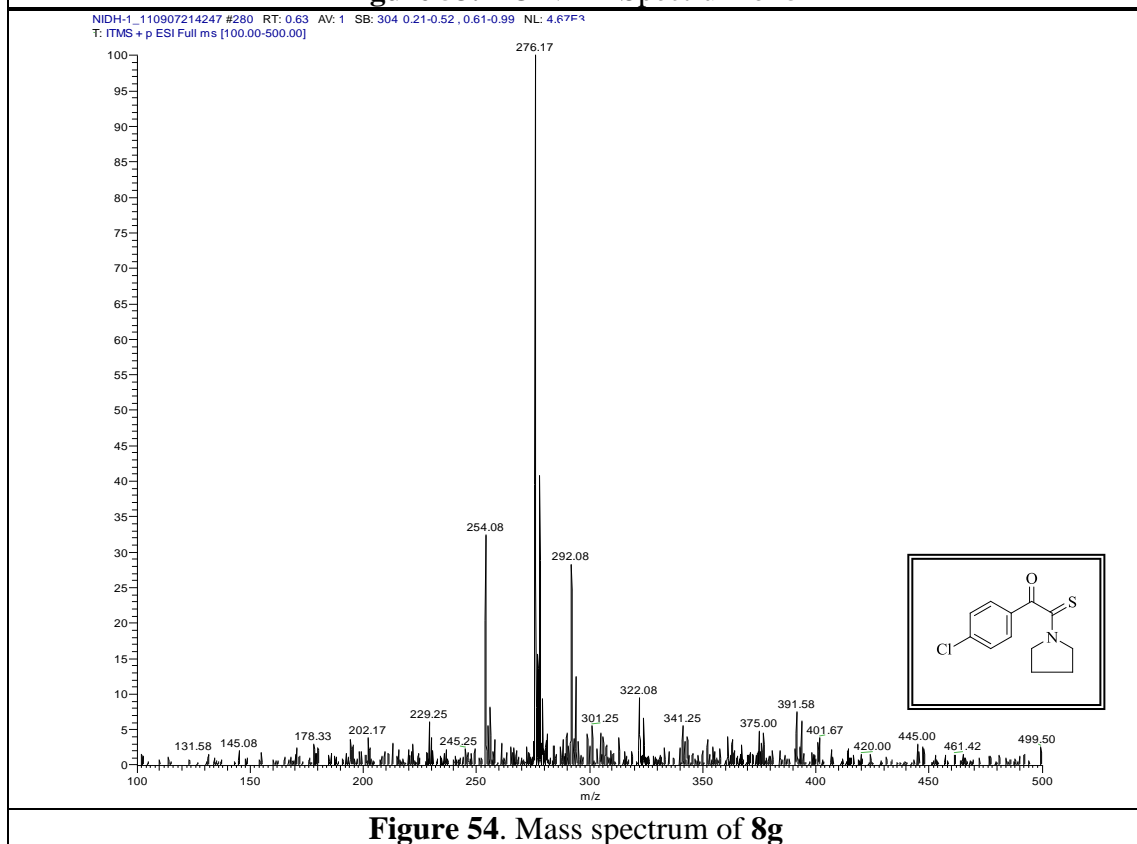

Figure 54. Mass spectrum of **8g**

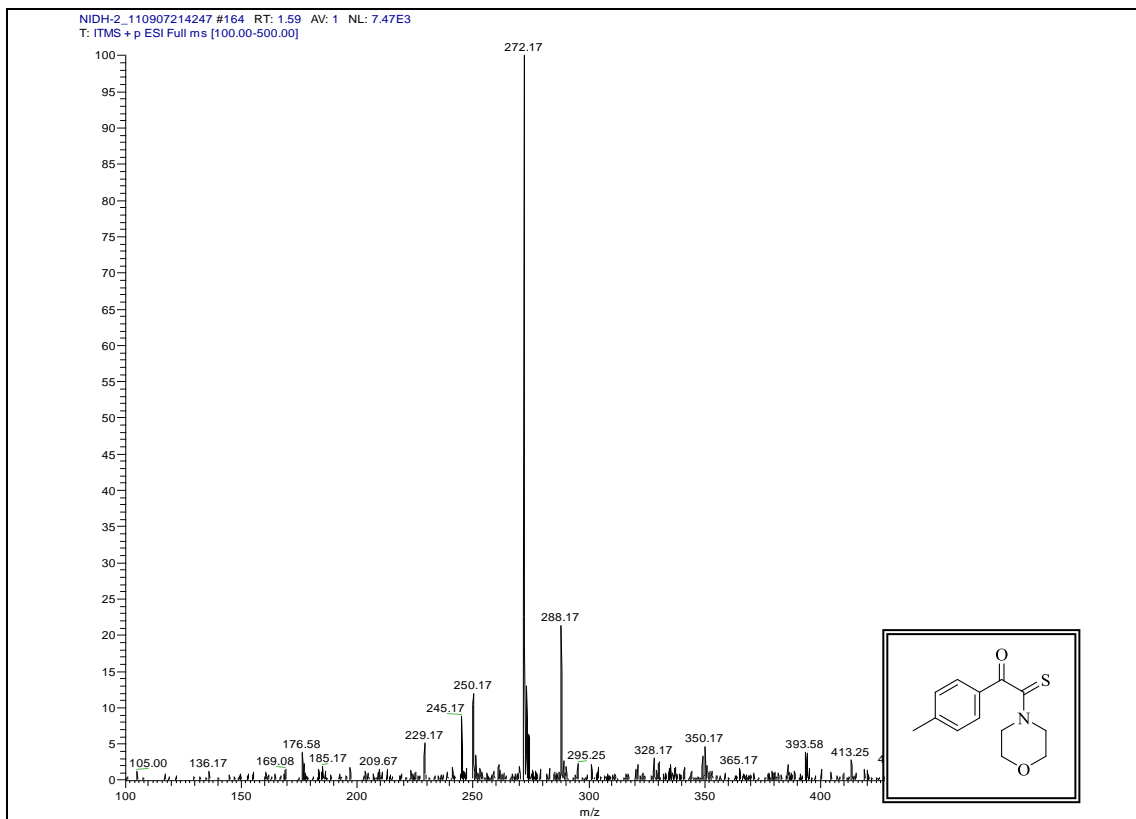

Figure 55. Mass spectrum of 8j

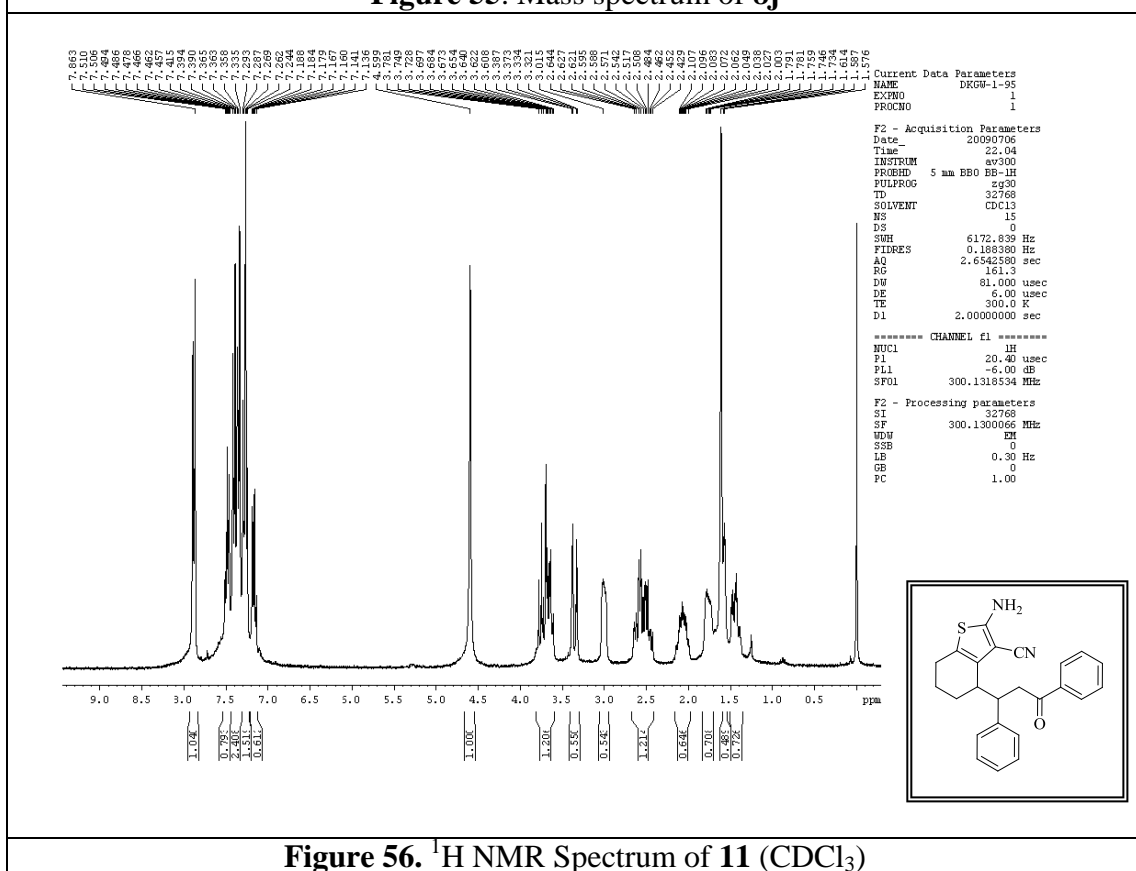

Figure 56. <sup>1</sup>H NMR Spectrum of 11 (CDCl<sub>3</sub>)





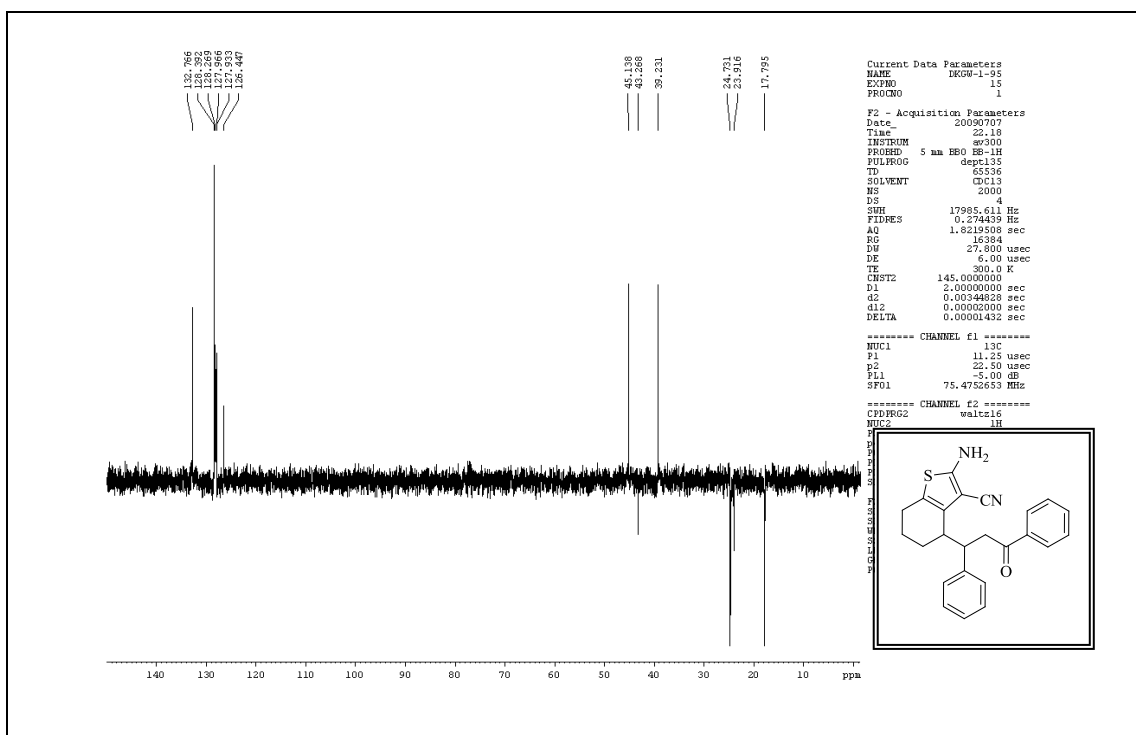

Figure 59. DEPT Spectrum of 11 (CDCl<sub>3</sub>)

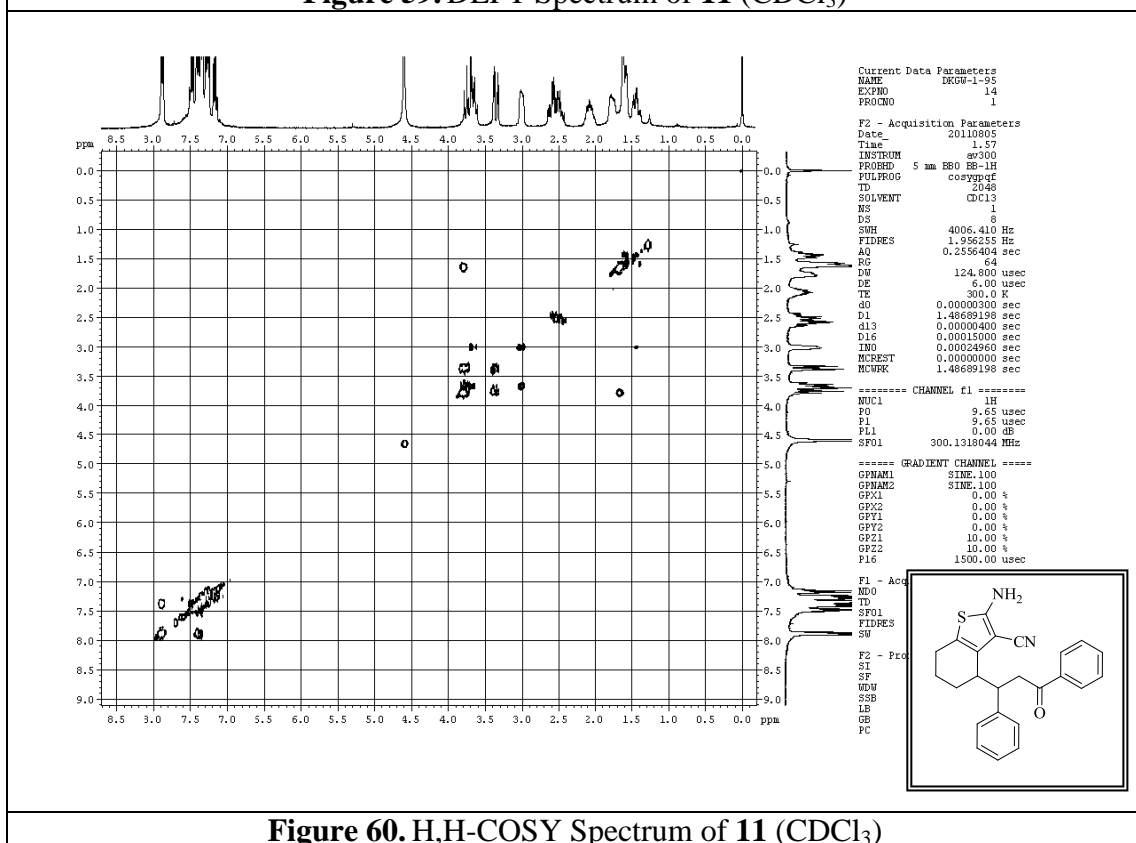

Figure 60. H,H-COSY Spectrum of 11 (CDCl<sub>3</sub>)

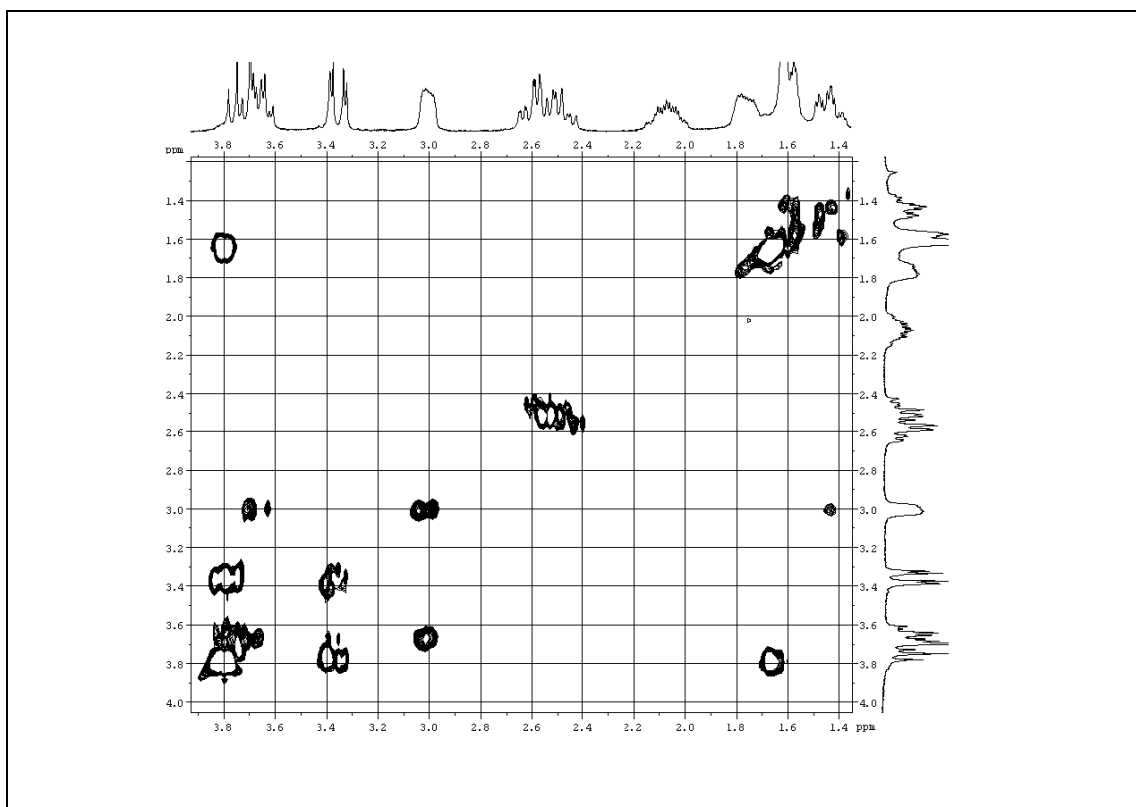

Figure 61. H,H-COSY Spectrum of 11 (expanded)

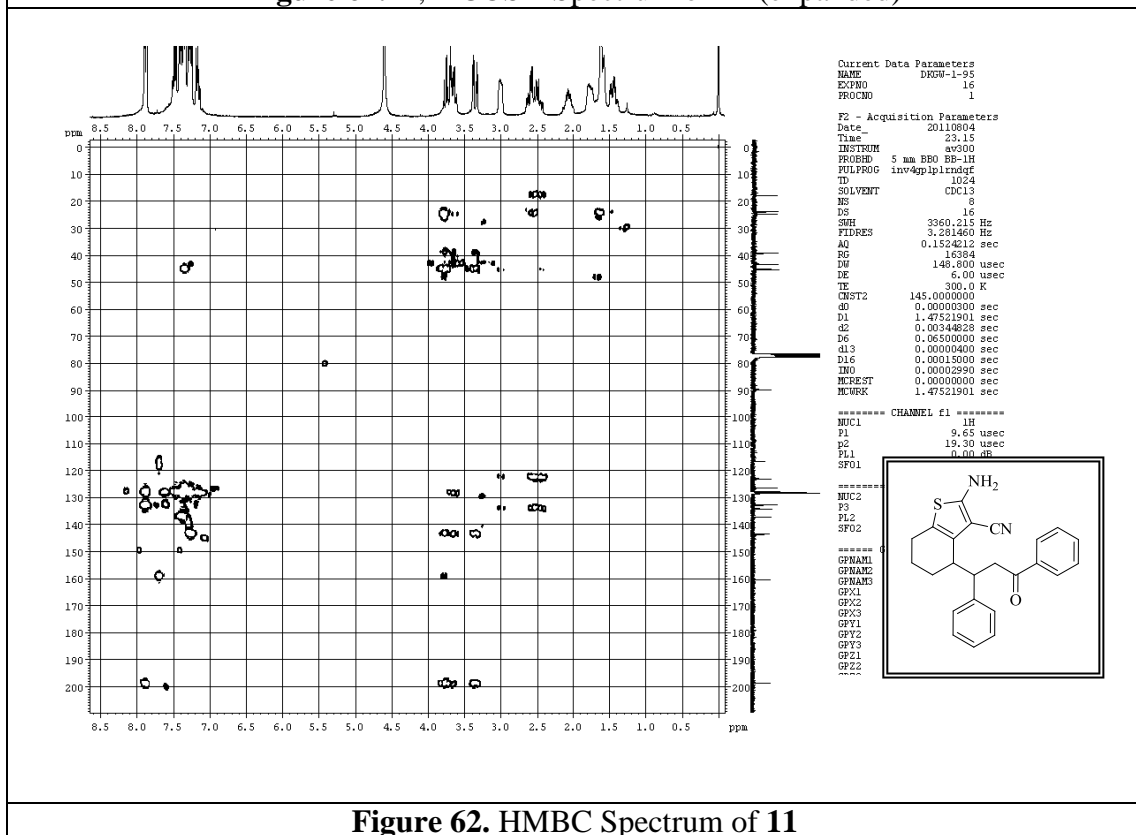

Figure 62. HMBC Spectrum of 11

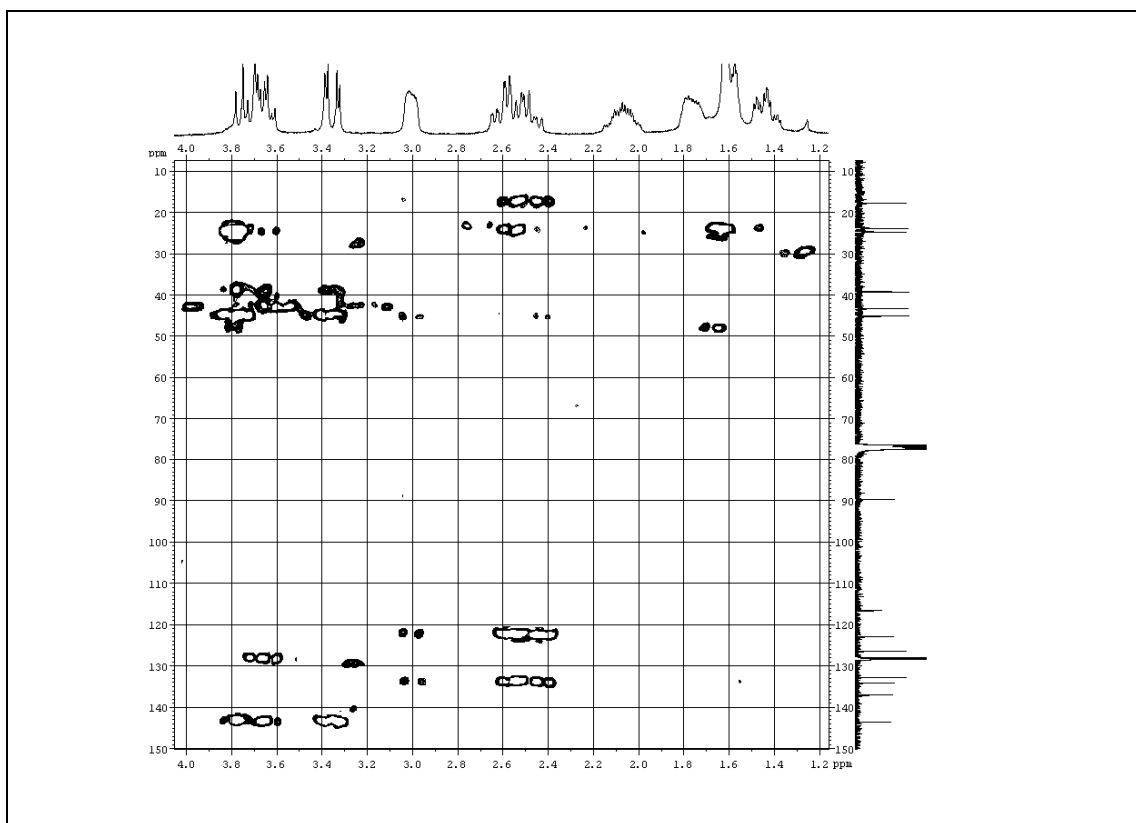

Figure 63. HMBC Spectrum of 11 (expanded)

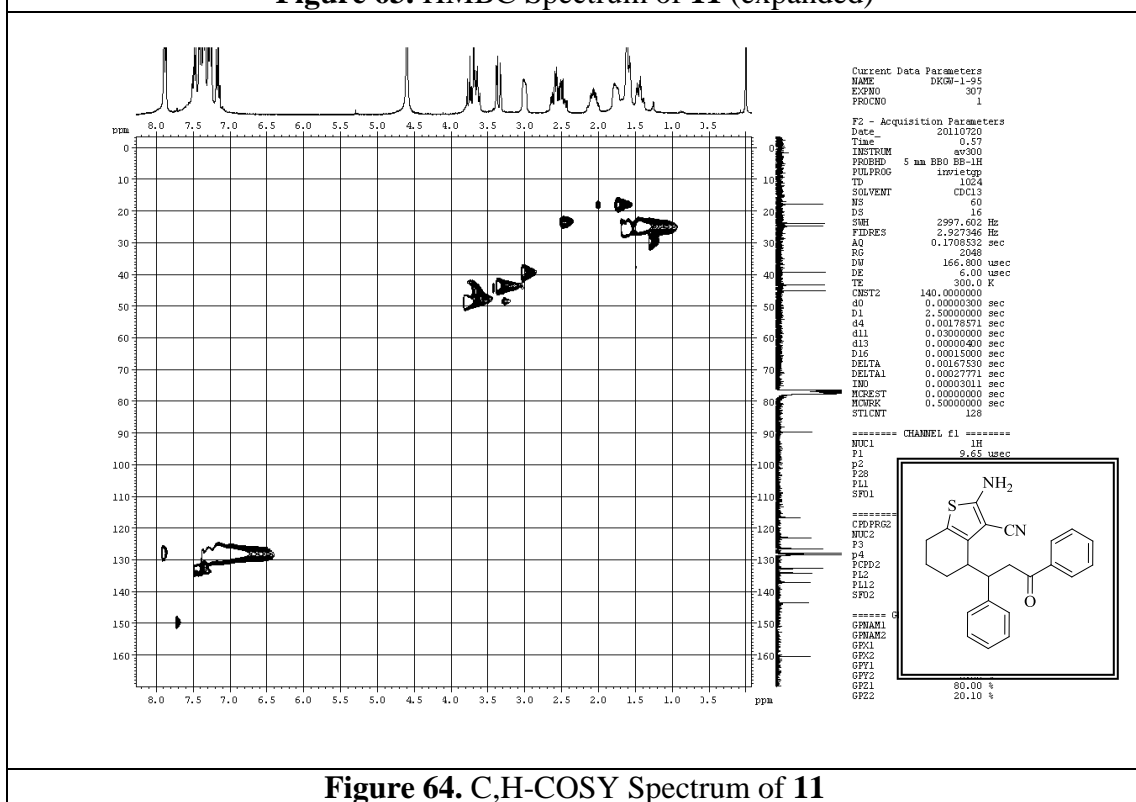

Figure 64. C,H-COSY Spectrum of 11

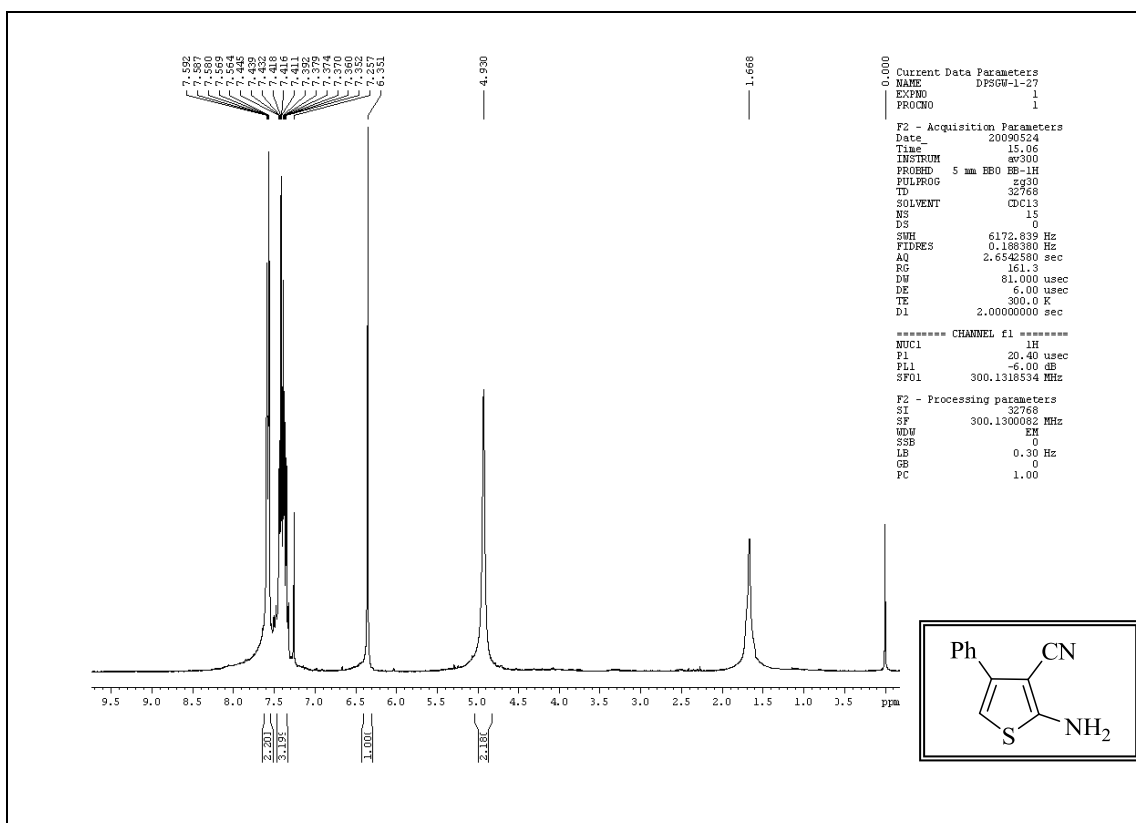

**Figure 65. <sup>1</sup>H NMR Spectrum of 9 (CDCl<sub>3</sub>)**

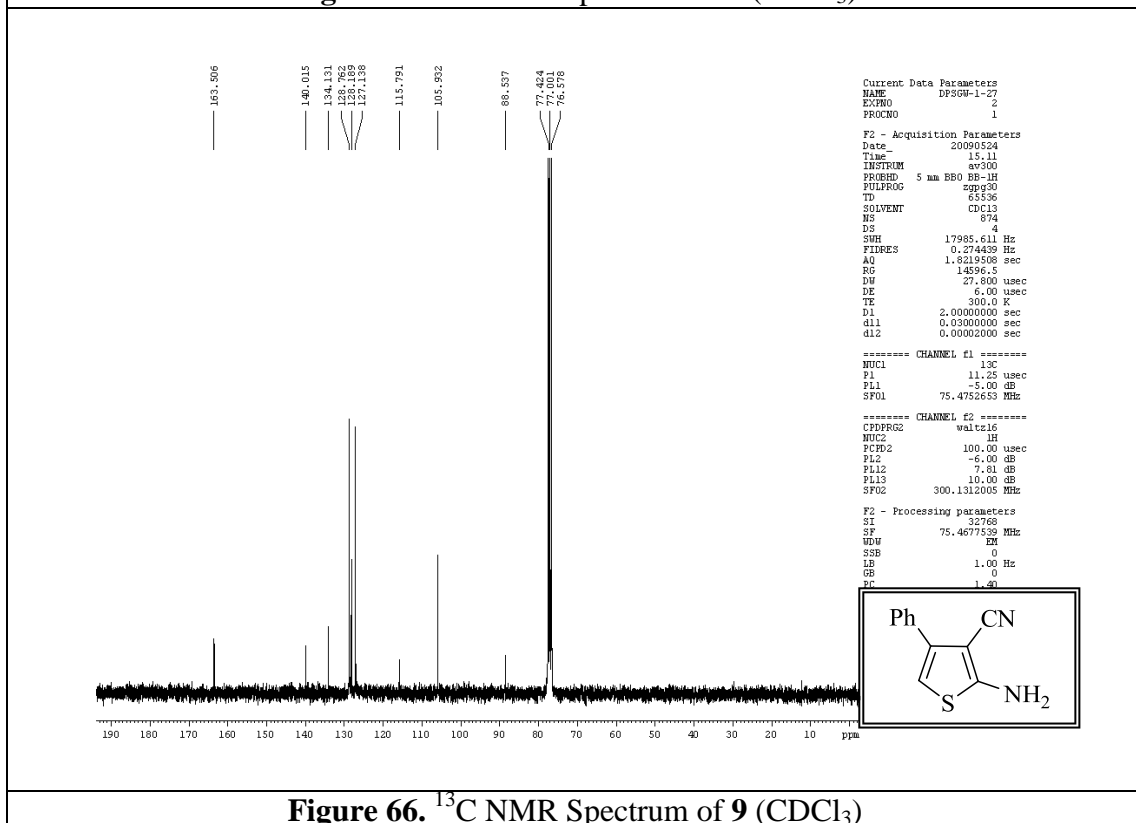

**Figure 66. <sup>13</sup>C NMR Spectrum of 9 (CDCl<sub>3</sub>)**

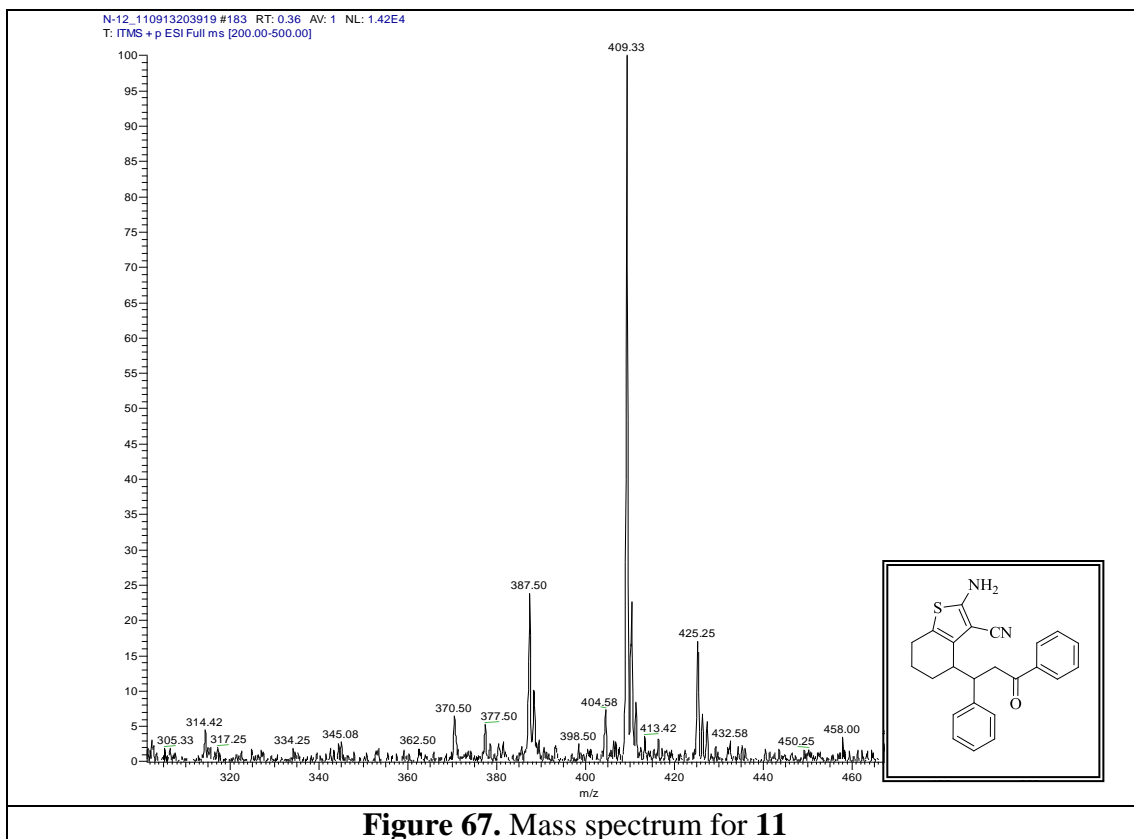

**Figure 67.** Mass spectrum for **11**

### Crystal Data for compound 5b

| Compound                          | 5b                                                                                                                    |
|-----------------------------------|-----------------------------------------------------------------------------------------------------------------------|
| Empirical formula                 | C <sub>23</sub> H <sub>19</sub> N O <sub>2</sub>                                                                      |
| Formula weight                    | 341.39                                                                                                                |
| Temperature                       | 293(2) K                                                                                                              |
| Wavelength                        | 0.71073 Å                                                                                                             |
| Crystal system                    | Monoclinic                                                                                                            |
| Space group                       | P 2 1/c                                                                                                               |
| Unit cell dimensions              | a = 10.0504(7) Å $\alpha$ = 90.00°.<br>b = 8.6750(7) Å $\beta$ = 103.066(6)°.<br>c = 21.4200(12) Å $\gamma$ = 90.00°. |
| Volume                            | 1819.2(2) Å <sup>3</sup>                                                                                              |
| Z                                 | 4                                                                                                                     |
| Density (calculated)              | 1.246 Mg/m <sup>3</sup>                                                                                               |
| Absorption coefficient            | 0.079 mm <sup>-1</sup>                                                                                                |
| F(000)                            | 720                                                                                                                   |
| Crystal size                      | 0.4 x 0.3 x 0.2 mm <sup>3</sup>                                                                                       |
| Theta range for data collection   | 3.05 to 25.00°.                                                                                                       |
| Index ranges                      | -11 ≤ h ≤ 11, -10 ≤ k ≤ 9, -25 ≤ l ≤ 24                                                                               |
| Reflections collected             | 11790                                                                                                                 |
| Independent reflections           | 3197 [R(int) = 0.0331]                                                                                                |
| Completeness to theta = 60.00°    | 99.9 %                                                                                                                |
| Max. and min. transmission        | 0.9902 and 0.9797                                                                                                     |
| Data / restraints / parameters    | 3197 / 0 / 236                                                                                                        |
| Goodness-of-fit on F <sup>2</sup> | 1.018                                                                                                                 |
| Final R indices [I > 2σ(I)]       | R1 = 0.0477, wR2 = 0.1407                                                                                             |
| R indices (all data)              | R1 = 0.0695, wR2 = 0.1626                                                                                             |
| Largest diff. peak and hole       | 0.158 and -0.193 e.Å <sup>-3</sup>                                                                                    |
